# Supplementary material for: Balance deficiencies in women with fibromyalgia assessed using computerised dynamic posturography: a cross-sectional study in Spain
Source: PubMed Central journal article supplement — BMJ Open. 2017 Aug 1;7(7):e016239. doi: 10.1136/bmjopen-2017-016239 (PMC5642772; doi:10.1136/bmjopen-2017-016239), 2017-08-01
Supplement: bmjopen-2017-016239.draft_revisions.pdf [file bmjopen-2017-016239.draft_revisions.pdf]

# BMJ Open

BMJ Open is committed to open peer review. As part of this commitment we make the peer review history of every article we publish publicly available.

When an article is published we post the peer reviewers' comments and the authors' responses online. We also post the versions of the paper that were used during peer review. These are the versions that the peer review comments apply to.

The versions of the paper that follow are the versions that were submitted during the peer review process. They are not the versions of record or the final published versions. They should not be cited or distributed as the published version of this manuscript.

BMJ Open is an open access journal and the full, final, typeset and author-corrected version of record of the manuscript is available on our site with no access controls, subscription charges or pay-per-view fees (<http://bmjopen.bmj.com>).

If you have any questions on BMJ Open's open peer review process please email [editorial.bmjopen@bmj.com](mailto:editorial.bmjopen@bmj.com)

# BMJ Open

## Balance deficiencies in women with fibromyalgia assessed using computerized dynamic posturography: a cross-sectional study in Spain

|                                 |                                                                                                                                                                                                                                                                                                                                                                                                                                                                                                                                                                                                                                                                                                                                                                                                                                                                                                                                                                                                                                                                                                 |
|---------------------------------|-------------------------------------------------------------------------------------------------------------------------------------------------------------------------------------------------------------------------------------------------------------------------------------------------------------------------------------------------------------------------------------------------------------------------------------------------------------------------------------------------------------------------------------------------------------------------------------------------------------------------------------------------------------------------------------------------------------------------------------------------------------------------------------------------------------------------------------------------------------------------------------------------------------------------------------------------------------------------------------------------------------------------------------------------------------------------------------------------|
| Journal:                        | <i>BMJ Open</i>                                                                                                                                                                                                                                                                                                                                                                                                                                                                                                                                                                                                                                                                                                                                                                                                                                                                                                                                                                                                                                                                                 |
| Manuscript ID                   | bmjopen-2017-016239                                                                                                                                                                                                                                                                                                                                                                                                                                                                                                                                                                                                                                                                                                                                                                                                                                                                                                                                                                                                                                                                             |
| Article Type:                   | Research                                                                                                                                                                                                                                                                                                                                                                                                                                                                                                                                                                                                                                                                                                                                                                                                                                                                                                                                                                                                                                                                                        |
| Date Submitted by the Author:   | 02-Feb-2017                                                                                                                                                                                                                                                                                                                                                                                                                                                                                                                                                                                                                                                                                                                                                                                                                                                                                                                                                                                                                                                                                     |
| Complete List of Authors:       | <p>Perez-de-Heredia, Marta; Universidad Rey Juan Carlos, Physiotherapy, Occupational Therapy, Rehabilitation and Physical Medicine.<br/>           Huertas-Hoyas, Elisabet; Universidad Rey Juan Carlos Facultad de Ciencias de la Salud, Physical Therapy, Occupational Therapy, Rehabilitation and Physical Medicine<br/>           Martínez-Piedrola, Rosa; Universidad Rey Juan Carlos, Physiotherapy, Occupational Therapy, Rehabilitation and Physical Medicine.<br/>           Palacios-Cena, Domingo; Univ Rey Juan Carlos, Physical Therapy, Occupational Therapy, Rehabilitation and Physical Medicine; Universidad Rey Juan Carlos,<br/>           Alegre-Ayala, Jorge; Universidad Rey Juan Carlos Facultad de Ciencias de la Salud, Physical Therapy, Occupational Therapy, Rehabilitation and Physical Medicine<br/>           Santamaría Vázquez, Montserrat; Universidad de Burgos<br/>           Fernández de las Peñas, Cesar; Universidad Rey Juan Carlos Facultad de Ciencias de la Salud, Physical Therapy, Occupational Therapy, Rehabilitation and Physical Medicine</p> |
| <b>Primary Subject Heading</b>: | Rheumatology                                                                                                                                                                                                                                                                                                                                                                                                                                                                                                                                                                                                                                                                                                                                                                                                                                                                                                                                                                                                                                                                                    |
| Secondary Subject Heading:      | Occupational and environmental medicine, Rehabilitation medicine                                                                                                                                                                                                                                                                                                                                                                                                                                                                                                                                                                                                                                                                                                                                                                                                                                                                                                                                                                                                                                |
| Keywords:                       | Postural Balance, Fibromyalgia, Patient Positioning                                                                                                                                                                                                                                                                                                                                                                                                                                                                                                                                                                                                                                                                                                                                                                                                                                                                                                                                                                                                                                             |
|                                 |                                                                                                                                                                                                                                                                                                                                                                                                                                                                                                                                                                                                                                                                                                                                                                                                                                                                                                                                                                                                                                                                                                 |

SCHOLARONE™  
Manuscripts

1  
2  
3 **Balance deficiencies in women with fibromyalgia assessed using computerized**  
4  
5 **dynamic posturography: a cross-sectional study in Spain**  
6  
7  
8  
9

- 10  
11 • Marta Pérez-de-Heredia-Torres<sup>1</sup>, PhD, Occupational therapist. Avenida de Atenas s/n.  
12 CP.28922, Alcorcón, Madrid. Tel. +34914888886. Fax: +34914888957.  
13 [marta.perezdeheredia@urjc.es](mailto:marta.perezdeheredia@urjc.es)  
14  
15 • Elisabet Huertas-Hoyas<sup>1</sup>, PhD, Occupational therapist. Avenida de Atenas s/n. CP.28922,  
16 Alcorcón, Madrid. Tel. +34914889023. Fax: +3491488 89 57. [elisabet.huertas@urjc.es](mailto:elisabet.huertas@urjc.es)  
17  
18 • M<sup>a</sup> Rosa Martínez-Piédrola<sup>1</sup>, PhD, Occupational therapist. Avenida de Atenas s/n. CP.28922,  
19 Alcorcón, Madrid. Tel. +34914888887. Fax: +3491488 89 57. [rosa.martinez@urjc.es](mailto:rosa.martinez@urjc.es)  
20  
21 • Domingo Palacios-Ceña<sup>1</sup>, PhD, Nurse. Avenida de Atenas s/n. CP.28922, Alcorcón, Madrid.  
22 Tel. +34914888883. Fax: +3491488 89 57. [domingo.palacios@urjc.es](mailto:domingo.palacios@urjc.es)  
23  
24 • Jorge Alegre-Ayala<sup>1</sup>, PhD, Occupational therapist. Avenida de Atenas s/n. CP.28922,  
25 Alcorcón, Madrid. Tel. +34914889023. Fax: +3491488 89 57. [jorge.alegre@urjc.es](mailto:jorge.alegre@urjc.es)  
26  
27 • César Fernández-de-las-Peñas<sup>1</sup>, PhD, Physical therapist. Avenida de Atenas s/n. CP.28922,  
28 Alcorcón, Madrid. Spain. Tel. +34 914888884. Fax: +34914888957.  
29 [cesar.fernandez@urjc.es](mailto:cesar.fernandez@urjc.es)  
30  
31  
32  
33  
34  
35  
36  
37  
38  
39  
40  
41  
42  
43  
44  
45  
46  
47  
48  
49  
50  
51  
52  
53  
54  
55  
56  
57  
58  
59  
60

<sup>1</sup>Rey Juan Carlos University, Physical Therapy, Occupational Therapy, Rehabilitation and Physical Medicine Department, Madrid, Spain

**Corresponding author:**

Elisabet Huertas Hoyas,

Rey Juan Carlos University. Health Sciences Faculty.

Email: [elisabet.huertas@urjc.es](mailto:elisabet.huertas@urjc.es)

**ABSTRACT**

**Objectives:** to investigate which sensory component is most affected (i.e. vestibular, visual and somatosensory) in women with fibromyalgia and to evaluate the association between functional independence and balance responses.

**Design:** A cross-sectional observational study using non-probabilistic sampling of consecutive cases. **Setting:** the study was carried out at Rey Juan Carlos University in Madrid, Spain. **Participants:** Twenty-nine women with fibromyalgia and 20 matched healthy controls were assessed. **Primary and secondary outcome measures:** included the Sensory Organization Test and the Functional Independence Measure. Between-group differences were analyzed with ANOVA and the Spearman's test was used for correlations. **Results:** Significant ( $P < 0.001$ ) between-group and between-condition differences were observed for the SOT balance values: fibromyalgia women showed somatosensory dependence in balance. Positive linear correlations were found with function in specific daily activities. **Conclusions:** Women with fibromyalgia exhibited balance deficiencies and used different strategies for maintaining their balance, resulting in a negative impact on functional independence.

**KEY WORDS:** Postural Balance, Fibromyalgia, Patient Positioning.

**Strengths and limitations of this study:**

- These findings will inform management interventions focused on improving somatosensory balance conditions as well as improving functioning during activities of daily living.
- This is the first study investigating these relationships: postural balance and activity daily living.
- These findings are valuable for planning proper treatment interventions.
- Small sample size and same regional hospital.
- It was only included women diagnosed with fibromyalgia.

## INTRODUCTION

Fibromyalgia (FM) is a chronic pain syndrome that has a considerable functional impact on patients. It is estimated that between 10-15% of the general population are affected by this syndrome, according to a recent European study<sup>1</sup>. The main complaint is generalized long-lasting muscle pain of an insidious and progressive onset. The pain is typically deep and intense, worsening with intense physical exercise, cold and/or emotional mental stress. This widespread pain is accompanied by asthenia, fatigue and poor nighttime resting (or non-restorative sleep) together with other poorly defined symptoms<sup>2</sup>. Additionally, individuals with FM present muscle asymmetry<sup>3</sup> and difficulty in relaxing their muscles, which can induce fatigue and pain, leading to poor posture<sup>4,5</sup>. Also, postural disturbances affecting the vertebral column have been observed<sup>6</sup>, as well as lower spatio-temporal parameters of gait<sup>7</sup> and a higher risk of falls<sup>8,9,10</sup>. Therefore, sometimes, this disorder can lead to general inactivity<sup>11</sup> with negative effects on the functional capacity of the upper extremity<sup>12</sup>.

On the other hand, postural control requires the appropriate integration of sensory, visual, vestibular and somatosensory information into the central nervous system (mainly integrated by proprioceptive and cutaneous sensitivity). Posturography is a technique that enables a quantitative assessment of postural control by studying the displacements of the center of pressure in different circumstances and by simulating actions from normal daily life<sup>13</sup>. This technique in isolation does not enable patient diagnosis, however provides information regarding functional status and is, therefore, valuable for guiding treatment. Some of the most utilized tests in posturography include the Sensory Organization Test (SOT), the motor control test and the adaptation test<sup>14</sup>. The SOT enables isolation of components from the vestibular, visual and somatosensory systems that participate in the maintenance of postural control, enabling

1  
2  
3 users to determine the site of the main disorder causing the loss of balance<sup>15</sup>. In fact,  
4  
5 some studies have reported the presence of deficits in the sensory organization and  
6  
7 postural control of women with FM using some of these equipments<sup>16,17</sup>. However,  
8  
9 these previous studies did not investigate which component (vestibular, visual or  
10  
11 somatosensory) was causing balance deficiencies in women with FM nor the potential  
12  
13 consequences of these deficits on functional independence in activities of daily living  
14  
15 (ADLs).  
16  
17

18  
19 Based on the hypothesis supported by prior studies which states that women with FM  
20  
21 have worse postural control than healthy women, the aims of the current study were: 1),  
22  
23 to investigate which sensory component is the most affected (vestibular, visual or  
24  
25 sensory); and, 2), to evaluate the association between the functional independence  
26  
27 measure (FIM) and balance responses in women with FM.  
28  
29

## 30 31 **METHODS**

### 32 33 **Research Design**

34  
35 A cross-sectional study was performed. We conducted non-probabilistic sampling of  
36  
37 consecutive cases, where subjects who met the established criteria were included. The  
38  
39 study was conducted during the second semester of 2015.  
40  
41

### 42 43 **Participants**

44  
45 Advertisements were placed in the local newspapers in order to recruit healthy  
46  
47 women from the general population to participate in the control group. The inclusion  
48  
49 criteria included: no current spontaneous pain, no history of chronic pain (lasting more  
50  
51 than 3 months), no pain experienced during the previous year prior to the study, no  
52  
53 pain-related diagnoses and participants who were not taking antidepressant or analgesic  
54  
55 medication.  
56  
57  
58  
59  
60

1  
2  
3 Female participants for the experimental group were recruited from the Department  
4 of Rheumatology at the University Foundation Alcorcón Hospital (Spain). An  
5 experienced rheumatologist confirmed the FM diagnosis according to the American  
6 College of Rheumatology (ACR) criteria<sup>18</sup>. Tender points were tested by digital  
7 palpation at the 18 sites according to the ACR protocol. Participants were asked to  
8 indicate whether they experienced pain in response to a pressure of approximately 4 kg  
9 exerted by the examiner. Further, the presence of fatigue, altered sleep patterns and  
10 other sensory symptoms experienced by the patients was also recorded<sup>19</sup>. Face-to-face  
11 structured interviews were performed to determine the time of the diagnosis, socio-  
12 demographic and clinical data, any medications participants were taking at the time of  
13 the study and the existence of psychiatric disorders.

14  
15  
16 Exclusion criteria for both groups included: 1) co-morbid medical diagnoses, e.g.,  
17 cardiopulmonary disorders, inflammatory disease, obesity, and other diagnoses; 2)  
18 malignancy; 3) psychiatric illnesses such as schizophrenia or substance abuse; 4)  
19 depression (Beck Depression Inventory-II >8 points); 5) previous history of surgery of  
20 any kind; 6) previous history of whiplash; 7) uncontrolled endocrine disorders (i.e.  
21 hyper- or hypo-thyroidism, diabetes); or 8) pregnancy.

22  
23  
24 Participants were matched on the basis of their age and hand dominance to gain  
25 homogeneity in the sample during the performance of ADLs involving the upper  
26 extremity. Hand dominance was determined by self-reports regarding the hand used for  
27 writing.

### 28 29 30 31 32 33 34 35 36 37 38 39 40 41 42 43 44 45 46 47 48 49 50 51 52 **Ethical considerations**

53  
54 This study was conducted in accordance with the ethical standards of the  
55 Declaration of Helsinki and was reviewed and approved by the Ethics committee of the  
56  
57  
58  
59  
60



1  
2  
3 University Hospital of Alcorcón, protocol number FHA-URJC 032. All participants  
4  
5 provided written informed consent.  
6  
7  
8

### 9 10 **Study procedure**

11 The study protocol was the same for all participants, with the exception of the  
12 Fibromyalgia Impact Questionnaire (FIQ), which was administered to women with FM  
13 in order to assess FM-related disability<sup>20</sup>. The Spanish version of the FIQ was used<sup>21</sup>.  
14  
15 All participants were verbally informed of the study, accepted the informed consent, and  
16  
17 were familiarized with the different measurement tools before the commencement of  
18  
19 data collection.  
20  
21  
22  
23

24  
25 First, the SOT protocol was performed and subsequently participants completed the  
26  
27 remaining assessments. All assessments were performed at a similar time of the day in  
28  
29 the laboratory for movement analysis, biomechanics, ergonomics and motor control  
30  
31 (LAMBECOM) at the Department of Physical Therapy, Occupational Therapy,  
32  
33 Rehabilitation and Physical Medicine, Faculty of Health Sciences, Rey Juan Carlos  
34  
35 University (Spain).  
36  
37

38 The Functional Independence Measure (FIM) assessment took place in a suitably  
39  
40 equipped apartment of the previously mentioned university department, via observation  
41  
42 of participants' functional independence demonstrated during the performance of daily  
43  
44 activities contained in the scale. An external evaluator performed assessments, who was  
45  
46 blinded to the condition of participants.  
47  
48  
49  
50  
51  
52  
53  
54  
55  
56  
57  
58  
59  
60

## Outcome measures

### *Functional independence measure (FIM)*

The FIM provides an assessment of the level of functional independence in daily life activities<sup>22</sup>. Also, it provides information primarily on cognitive and motor performance via 18 items. Scores range from 1-7, with higher scores corresponding to a higher level of functional independence. The possible range of the variable is between 0 and 126. The FIM includes observation and face-to-face interviews. This tool has demonstrated excellent psychometric properties<sup>23-25</sup>.

### *Sensory Organization Test (SOT)*

The posturography device used in the current study was the SOT assessment, which belongs to the Smart Balance Master©, by Neurocom® EQ0501, International, Inc (Oregon, USA)<sup>22, 23</sup>. This device consists of a platform connected to four symmetrically placed transducers measuring the horizontal forces exercised through the anterior-posterior axis in the plane parallel to the floor. It is also equipped with a mobile visual surround screen. The visual surround together with the platform are computer controlled and can move simultaneously. This device was connected to a PC Pentium I, with Smart Balance Master 5.0 software and a Samsung monitor. The reports were saved on the computer's hard drive.

To conduct the SOT, an individual's postural sway, and thereby balance, is measured under six different conditions during standing. During these tests, the base of support and the visual surround screen can move according to the patient's balancing responses and the strategy used for maintaining the upright position. The 6 conditions tested are: 1) eyes open, fixed visual surround and fixed support platform; 2) eyes closed, fixed support platform; 3) eyes open, mobile visual surround (moving proportional to the

1  
2  
3 angle of anterior-posterior body sway) and the fixed support platform; 4) eyes open,  
4 fixed visual surround and mobile support platform (moving proportional to the angle of  
5 anterior-posterior body sway); 5) eyes closed, mobile support platform; and 6) eyes  
6  
7  
8 open, mobile visual surround and mobile support platform. Tests were always  
9  
10 performed following these steps in order. Each condition was performed 3 consecutive  
11  
12 times. In total, the duration of the tests lasted approximately 12 minutes for each  
13  
14 patient; therefore, it can be considered a non-fatiguing assessment.  
15  
16  
17

18  
19 Participants were encouraged to maintain their stability and center of gravity, despite  
20 the movement of the visual surround or the base of support. The participant's center of  
21 gravity was displayed on the upper half of the assessment screen. The feet were  
22 correctly positioned facing the visual surround during the entire test. If the participant  
23 fell, took a step or touched the visual surround, the test was interrupted and this was  
24 registered. Data assessments were performed automatically and compared with  
25 theoretical normative electronic data. This was registered on a bar chart assessing the  
26 result from 1-100%.  
27  
28  
29  
30  
31  
32  
33  
34  
35  
36  
37

### 38 **Statistical Analysis**

39  
40 The SPSS statistical package was used for data analysis (version 19.0). A 2x6 mixed-  
41 model analysis of variance (ANOVA) with group (FM patients or controls) as a  
42 between-subjects factor and with condition of the SOT (from 1 to 6) as a within-  
43 subjects factor was used to analyze differences in the assessments of balance responses  
44 and strategies used for maintaining the upright position in the SOT. The hypothesis of  
45 interest was the Group \* Time interaction with a Bonferroni-corrected alpha of 0.008 (6  
46 independent-samples t tests by condition).  
47  
48  
49  
50  
51  
52  
53  
54  
55  
56  
57  
58  
59  
60

1  
2  
3 The Spearman's rho (rs) test was used to analyze the association between the clinical  
4 variables related to disability, symptoms, and FIM and the conditions of the SOT. A  
5 value of less than 0.05 was considered statistically significant for these correlations.  
6  
7  
8  
9

## 10 11 12 **RESULTS**

### 13 14 **Demographic and clinical data**

15  
16 Twenty-nine (n =29) women with FM were screened for eligibility criteria between  
17 January and November 2012. The final sample consisted of 20 women with FM, aged  
18 35-55 years old (mean:  $48 \pm 6$  years) who satisfied the eligibility criteria and agreed to  
19 participate. Causes for exclusion were as follows: previous surgery (n=3), whiplash  
20 syndrome (n=2), pregnancy (n=2), diabetes (n=1) and litigation (n=1). In addition, 20  
21 matched healthy women; aged 35–56 (mean  $47 \pm 6$  years) were also included. There  
22 were no significant differences in age between the two groups (P= 0.909). All the  
23 participants were right-handed. Seventeen (85%) women with FM (85%) were regularly  
24 taking non-steroidal anti-inflammatory medications.  
25  
26  
27  
28  
29  
30  
31  
32  
33  
34  
35

36 The FIQ revealed a moderate disability with a mean score of 57.9 (95%CI 53.1-  
37 62.6).  
38

39 All women participating in the study completed the assessments and therefore there  
40 were no missing data.  
41  
42  
43

### 44 45 **Fibromyalgia and balance**

46  
47 We performed an ANOVA test in order to investigate which sensory component  
48 determines the poorer postural control of women with FM. This revealed significant  
49 differences between groups (F=37.259; P<0.001) as well as between conditions  
50 (F=71.575; P<0.001) for the balance responses on the SOT: women with FM displayed  
51 significantly (P=0.005) lower values in all conditions compared to healthy women  
52  
53  
54  
55  
56  
57  
58  
59  
60

1  
2  
3 (table 1). A significant Group \* Condition interaction was also found ( $F=3.404$ ;  
4  $P=0.006$ ): the scores of conditions 4-6 were significantly lower ( $P=0.007$ ) than those for  
5 conditions 1-3, particularly within the FM group.  
6  
7

8  
9  
10 *[Insert table 1 about here]*

11 The ANOVA also revealed significant between-group differences ( $F=12.836$ ;  
12  $P<0.001$ ) and between-condition differences ( $F=64.526$ ;  $P<0.001$ ) for the balance  
13 strategies used for maintaining the upright position on the SOT: women with FM  
14 displayed significantly lower values ( $P<0.001$ ) in all conditions when compared with  
15 healthy women (table 1). No significant Group x Condition interaction was observed  
16 ( $F=1.170$ ;  $P=0.325$ ). Values of conditions 4-6 were once more lower ( $P<0.001$ ) than the  
17 values for conditions 1-3.  
18  
19  
20  
21  
22  
23  
24  
25  
26

### 27 **Correlations between clinical variables and balance in fibromyalgia**

28  
29 Within the group of women with FM, no significant linear correlation was found  
30 between the duration (years) of pain nor the intensity of the symptoms with any of the  
31 SOT conditions regarding both the balance and strategy sections. Table 2 displays  
32 correlation coefficients and the statistical significance for all conditions in the balance  
33 section, whereas table 3 displays the same data for each condition within the strategy  
34 section.  
35  
36  
37  
38  
39  
40  
41  
42

43 *[Insert table 2 about here]*

44  
45 *[Insert table 3 about here]*  
46  
47  
48

### 49 **Correlations between functionality and balance**

50  
51 To assess the association between functionality and balance, the Spearman's test was  
52 used. Positive linear correlations between balance and different ADLs variables were  
53 found within the group of women with FM (table 4). The balance condition N°6 (eyes  
54  
55  
56  
57  
58  
59  
60

1  
2  
3 open, mobile visual surround-mobile platform) was moderately correlated with the  
4 bathing activity ( $r_s=0.541$ ;  $P<0.001$ ), whereas conditions 2 and 3 were positively and  
5 moderately associated with the bed transfers activity ( $r_s=0.491$ ;  $P<0.001$ ;  $r_s=0.510$ ;  
6  $P<0.001$ , respectively): the greater the distortion of the postural balance in these  
7 conditions, the poorer the function in the respective ADLs.  
8  
9

10  
11  
12  
13  
14 ***[Insert table 4 about here]***  
15

16 Similarly, significant positive linear correlations were found between positioning  
17 strategy number 6 and the following ADLs: dressing the upper body ( $r_s=0.530$ ;  
18  $P<0.001$ ), dressing the lower body ( $r_s=0.562$ ;  $P<0.001$ ) and toileting ( $r_s=0.521$ ;  
19  $P<0.001$ ). In this manner, the greater the loss of balance, the greater interference there is  
20 with functional independence during daily activities.  
21  
22  
23  
24  
25  
26  
27

## 28 29 30 **DISCUSSION**

31 According to these findings, women with FM have poorer balance compared to  
32 healthy women, which is in line with previous studies<sup>14,15</sup>. Also, women with FM  
33 presented difficulties in all the conditions assessed under the SOT, both in activities  
34 with the eyes open as well as closed, as well as with fixed and moving surrounds and  
35 surfaces. Furthermore, the strategy used for stabilizing the ankle joint and the hip with  
36 the aim of maintaining the upright posture is poorer in women with FM compared to  
37 healthy women. These findings further support the need to objectively measure balance  
38 and postural deficiencies in women with FM.  
39  
40  
41  
42  
43  
44  
45  
46  
47  
48

49 Regarding the sensory analysis, both the vestibular as well as the visual quotients  
50 were abnormally decreased in FM, however, lower scores were observed in conditions 4  
51 to 6, which are the more challenging conditions, as these correspond with the mobile  
52 platform conditions. As suggested by Barona<sup>15</sup>, lower values in the last conditions  
53  
54  
55  
56  
57  
58  
59  
60

1  
2  
3 compared to the first conditions with the fixed platform, suggest a degree of somato-  
4 sensory dependence. These observations are in line with those obtained by De Brujin  
5 and collaborators<sup>28</sup> who found that in patients with FM, their balance is only optimal on  
6 firm and regular floors. Thus, patients with FM are individuals with central nervous  
7 system alterations who are clinically disabled. These findings coincide with a pilot  
8 study<sup>29</sup> that included 32 women with FM who completed the Smart Balance Master®  
9 test by Neurocom®, and found values below the normative population scores in  
10 affected subjects, suggesting the presence of deficits in sensory organization and  
11 postural control. Further, in the aforementioned study, condition N° 5 produced  
12 markedly lower scores due to a vestibular and visual alteration, similar to the findings of  
13 the current study. Other authors have studied postural balance via the Activities-specific  
14 Balance Confidence Scale<sup>17</sup> or the Balance Evaluation-Systems Test (BESTest)<sup>16</sup>. In the  
15 latter study<sup>16</sup>, 34 patients with FM and 32 healthy subjects were analyzed, and a  
16 significant decline was found in the patients for all the sections of the BESTest.  
17  
18  
19  
20  
21  
22  
23  
24  
25  
26  
27  
28  
29  
30  
31  
32  
33

34  
35 Based on the premise that there is no consensus on the effectiveness of rehabilitation  
36 for the treatment of this syndrome due to the inconsistency of the published studies<sup>30-32</sup>  
37 and considering that the SOT is a reliable and objective tool providing clinically  
38 relevant data and measurements, our findings are relevant for the planning of future  
39 interventions in order to improve the effectiveness of rehabilitation treatments by  
40 considering the somatosensory difficulties when planning rehabilitation treatments.  
41 Also, the role of the knee joint in the neurosensory organization of balance control and  
42 the generation of postural sensorimotor strategies in this population warrants  
43 consideration in future studies, based on reports by Gauchard et al.<sup>33</sup> in osteoarthritis.  
44  
45  
46  
47  
48  
49  
50  
51  
52  
53  
54

55  
56 Regarding the relation between balance and functional independence in ADLs, the  
57 results of the current study point to a positive linear correlation between these factors:  
58  
59  
60

1  
2  
3 the greater the loss of postural balance, the greater the interference with all activities  
4 requiring good postural control and balance, such as bathing and dressing. To our  
5 knowledge, this is the first study investigating these relationships. These findings are  
6 valuable for planning proper treatment interventions, as the loss of independence in  
7 ADLs has a negative impact on quality of life. Our results support previous research by  
8 Amris et al.<sup>34</sup> who studied 257 women with widespread chronic pain and reported that  
9 FM patients have substantial problems affecting their daily life and are liable to need  
10 community support.  
11  
12  
13  
14  
15  
16  
17  
18  
19

20  
21 This study presents several limitations. First, although significant differences were  
22 found between the two study groups, these were based on a small sample size.  
23 Furthermore, the population included was recruited from the same regional hospital,  
24 which makes generalization of the results to the general population difficult.  
25 Consequently, further epidemiological studies with larger sample sizes are needed to  
26 enable a more generalized interpretation of the results. Secondly, in the present study,  
27 we only included women diagnosed with FM. It is unknown whether men with FM  
28 would also exhibit similar deficiencies. Third, as fatigue is a common denominator in  
29 patients with FM, it was unknown whether the inclusion of several functional outcomes  
30 could be affected by rest-periods. Finally, it is important to note that postural balance  
31 may be influenced by the psychological status of the patients. For instance, the presence  
32 of depression or anxiety may have affected these results<sup>35</sup> and therefore future studies  
33 should include these psychological outcomes into the design.  
34  
35  
36  
37  
38  
39  
40  
41  
42  
43  
44  
45  
46  
47  
48  
49  
50

## 51 CONCLUSIONS

52  
53  
54 Women with FM present lower values in tests for balance and use different strategies  
55 for maintaining upright posture compared to healthy women. Furthermore we have  
56  
57  
58  
59  
60



1  
2  
3 detected that in women with FM, balance depends on somatosensory sensitivity. This  
4  
5 finding suggests that treatments for this disorder should specifically target the recovery  
6  
7 or compensation of these balance deficits, due to their negative influence upon activities  
8  
9 that are seemingly simple and commonplace in patients with high levels of autonomy.  
10  
11 Also, these findings demonstrate a relation between the balance difficulties encountered  
12  
13 by women with FM and the impact of the same on ADLs. Multidisciplinary treatments  
14  
15 directed at improving the problems faced during ADLs may help improve the autonomy  
16  
17 of women with FM.  
18  
19  
20  
21  
22

### 23 **Contributorship Information**

- 25 • Concept development (provided idea for the research): Marta Pérez de Heredia  
26 Torres.
- 27 • Design (plane the methods to generate the results): Marta Pérez de Heredia  
28 Torres, Elisabet Huertas Hoyas, Rosa Martínez Piédrola, Domingo Palacios  
29 Ceña, Jorge Alegre Ayala, Montserrat Santamaría Vázquez, César Fernández de  
30 las Peñas.
- 31 • Supervision (provided oversight, responsible for organization and  
32 implementation, writing of the manuscript): Marta Pérez de Heredia Torres,  
33 Elisabet Huertas Hoyas and César Fernández de las Peñas.
- 34 • Datta Collection/processing (responsible for experiments, patient management,  
35 organization, or reporting data): Rosa Martínez Piédrola, Domingo Palacios  
36 Ceña, and Montserrat Santamaría Vázquez.
- 37 • Analysis/interpretation (responsible for statistical analysis, evaluation, and  
38 presentation of the results): Marta Pérez de Heredia Torres, Elisabet Huertas  
39 Hoyas, Domingo Palacios Ceña, Jorge Alegre Ayala, César Fernández de las  
40 Peñas.
- 41 • Literature search (performed the literature search): Marta Pérez de Heredia  
42 Torres, Elisabet Huertas Hoyas, Rosa Martínez Piédrola, Domingo Palacios  
43 Ceña, and Montserrat Santamaría Vázquez.
- 44 • Literature search (performed the literature search): Marta Pérez de Heredia  
45 Torres, Elisabet Huertas Hoyas, Rosa Martínez Piédrola, Domingo Palacios  
46 Ceña, and Montserrat Santamaría Vázquez.
- 47 • Literature search (performed the literature search): Marta Pérez de Heredia  
48 Torres, Elisabet Huertas Hoyas, Rosa Martínez Piédrola, Domingo Palacios  
49 Ceña, and Montserrat Santamaría Vázquez.
- 50 • Literature search (performed the literature search): Marta Pérez de Heredia  
51 Torres, Elisabet Huertas Hoyas, Rosa Martínez Piédrola, Domingo Palacios  
52 Ceña, and Montserrat Santamaría Vázquez.
- 53 • Literature search (performed the literature search): Marta Pérez de Heredia  
54 Torres, Elisabet Huertas Hoyas, Rosa Martínez Piédrola, Domingo Palacios  
55 Ceña, and Montserrat Santamaría Vázquez.
- 56 • Literature search (performed the literature search): Marta Pérez de Heredia  
57 Torres, Elisabet Huertas Hoyas, Rosa Martínez Piédrola, Domingo Palacios  
58 Ceña, and Montserrat Santamaría Vázquez.
- 59 • Literature search (performed the literature search): Marta Pérez de Heredia  
60 Torres, Elisabet Huertas Hoyas, Rosa Martínez Piédrola, Domingo Palacios  
Ceña, and Montserrat Santamaría Vázquez.

- Writing (responsible for writing a substantive part of the manuscript): Marta Pérez de Heredia Torres, Elisabet Huertas Hoyas, Rosa Martínez Piédrola, Domingo Palacios Ceña, Jorge Alegre Ayala, Montserrat Santamaría Vázquez, César Fernández de las Peñas.
- Critical review (revised manuscript for intellectual content, this does not relate to spelling and grammar checking): Marta Pérez de Heredia Torres, Elisabet Huertas Hoyas and César Fernández de las Peñas.

### **Competing interests**

All authors declare: no support from any organisation for the submitted work; no financial relationships with any organisations that might have an interest in the submitted work in the previous three years, no other relationships or activities that could appear to have influenced the submitted work.

### **Funding**

This research received no specific grant from any funding agency in the public, commercial, or not-for-profit sectors.

### **Data sharing statement**

No additional data are available.

**REFERENCES**

- [1] Branco JC, Bannwarth B, Failde I, Abelló Carbonell J, Blotman F, Spaeth M and cols. Prevalence of fibromyalgia: a survey in five European countries. *Semin Arthritis Rheum*. 2010 Jun; 39(6):448-53. .
- [2] Villanueva VL, Valía JC, Cerdá G, MonsalveV, Bayona MJ, De Andrés J. [Fibromyalgia: diagnosis and treatment. Current knowledge]. *Rev Soc Española Dolor*. 2004; 11:430-43.
- [3] Mitani Y, Fukunaga M, Kanbara K, Takebayashi N, Ishino S, Nakai Y. Evaluation of psychophysiological asymmetry in patients with fibromyalgia syndrome. *Appl Psychophysiol Biofeedback*. 2006;31:217–25.
- [4] Zidar J, Beckman E, Bengtsson A, Henriksson KG. Quantitative EMG and muscle tension in painful muscles in fibromyalgia. *Pain*. 1990; 40: 249-54.
- [5] Westgaard RH. Muscle activity as a releasing factor for pain in the shoulder and neck. *Cephalalgia*. 1999;19:S1-S8.
- [6] Müller W, Kelemen J, Stratz T. Spinal factors in the generation of fibromyalgia syndrome. *Z Rheumatol*. 1998;57: S36-S42.
- [7] Latorre-Román P., Santos-Campos M., Heredia-Jimenez J., Delgado-Fernández M., Soto-Hermoso V. Analysis of the performance of women with fibromyalgia in the six-minute walk test and its relation with health and quality of life. *J. Sports Med. Phys. Fit*. 2014; 54(4):511-7

1  
2  
3 [8] Meireles SA, Antero DC, Kulczycki MM, Skare TL. Prevalence of falls in  
4 fibromyalgia patients. *Acta Orto Brasil*. 2014;22:163-66.  
5  
6

7  
8 [9] Jones KD, King LA, Mist SD, Bennett RM, Horak FB. Postural control deficits  
9 in people with fibromyalgia: a pilot study. *Arthritis Res Ther*. 2011; 13:R127.  
10  
11

12  
13 [1025] Akkaya N, Akkaya S, Atalay NS, Acar M, Catalbas N, Sahin F. Assessment  
14 of the relationship between postural stability and sleep quality in patients with  
15 fibromyalgia. *Clin Rheumatol*. 2013; 32:325-31  
16  
17

18  
19 [11] Simms RW, Roy SH, Hrovat M, et al. Lack of Association between  
20 Fibromyalgia Syndrome and Abnormalities in Muscle Energy Metabolism. *Arthritis*  
21 *Rheum*. 1994;37:794-800.  
22  
23

24  
25 [12] Canny ML, Thompson JM, Wheeler MJ. Reliability of the box and block test of  
26 manual dexterity for use with patients with fibromyalgia. *Am J Occup Ther*.  
27 2009;63:506-10.  
28  
29

30  
31 [13] Galeano D, Brunetti F, Torricelli D, Piazza S, Pons JL. A tool for balance  
32 control training using muscle synergies and multimodal interfaces. *BioMed Res*  
33 *Inter*. 2014; 2014:565-70.  
34  
35

36  
37 [14] Leitner C, et al. Reliability of posturographic measurements in the assessment  
38 of impaired sensorimotor function in chronic low back pain. *J Electrom Kines*.  
39 2009; 19: 380-90.  
40  
41

42  
43 [15] Barona, R. (1998): Posturografía. En: Bartual, J. y Pérez, N. eds. *El sistema*  
44 *vestibular y sus alteraciones*. Barcelona, Masson: 150-5.  
45  
46  
47  
48  
49  
50  
51  
52  
53  
54  
55  
56  
57  
58  
59  
60

1  
2  
3 [16] Jones KD, Horak FB, Winters Stone K, Irvine JM, Bennett RM. Fibromyalgia  
4 is associated with impaired balance and falls. *J Clin Rheumatol*. 2009; 15:16-21.  
5  
6

7  
8 [17] Muto L, Mango P, Sauer J, Yuan S, Sousa A, Marques A. Postural control and  
9 balance self efficacy in women with fibromyalgia. Are there differences? *Eur J*  
10 *Physl Rehabil Med*. 2015, 51:149-54.  
11  
12

13  
14 [18] Wolfe F, et al. The American College of Rheumatology. Criteria for the  
15 classification of fibromyalgia. Report of the multicenter criteria comitee. *Arthritis*  
16 *Rheum*. 1990;33:160-72.  
17  
18

19  
20 [19] Wolfe F, et al. The American College of Rheumatology preliminary diagnostic  
21 criteria for fibromyalgia and measurement of symptom severity. *Arthritis Care Res*.  
22 2010; 62:600-10.  
23  
24

25  
26 [20] Burckhardt CS, Clark SR, Bennett RM. The Fibromyalgia Impact  
27 Questionnaire: development and validation. *J Rheumatol*1991;18: 728-33.  
28  
29

30  
31 [21] Esteve Vives JJ, Rivera J, Salvat Salvat I, Gracia Blanco M, Alegre de Miguel  
32 C. Porposal for a consensus version of the Fibromyalgia Impact Questionnaire (FIQ)  
33 for the Spanish population. *Reumatol Clin*. 2007; 3: 21-24.  
34  
35

36  
37 [22] Guide for the Uniform Data Set for Medical Rehabilitation (Adult FIM).  
38 Version 4.0., Buffalo (Nueva York): State University of New York at Buffalo; 1993.  
39  
40

41  
42 [23] Dodds, T. A., Martin, D. P., et al. A validation of the functional independence  
43 measurement and its performance among rehabilitation inpatients." *Arch Phys Med*  
44 *Rehabil*. 1993; 74(5): 531-536.  
45  
46

47  
48 [24] Heinemann, A. W., Linacre, J. M., et al. "Prediction of rehabilitation  
49 outcomes with disability measures." *Arch Phys Med Rehabil* . 1994; 75(2): 133-143  
50  
51  
52  
53  
54

- 1  
2  
3  
4  
5 [25] Hobart, J. C., Lamping, D. L., et al. Evidence-based measurement: which  
6 disability scale for neurologic rehabilitation? *Neurology*. 2001;57(11524472): 639-  
7 644  
8  
9 [26] Black FO, Nashner LM. Postural control in four classes of vestibular  
10 abnormalities". En M. Igarashi y F. O. Black, eds. *Vestibular and Visual Control on*  
11 *Posture and Locomotor Equilibrium*. (pp.271-281). Nueva York: Karger  
12 Publications; 1985.  
13  
14 [27] Bowman C, Mangham C. Clinical use of moving platform posturography.  
15 *Semin Hearing*. 1989; 10:161-71.  
16  
17 [28] de Brujin ST, et al. Relevance of physical fitness levels and exercise-related  
18 beliefs for self-reported and experimental pain in fibromyalgia: an explorative  
19 study. *Clin Rheumatol*. 2011;17:295-301.  
20  
21 [29] Russek LN, Fulk GD. Pilot study assessing balance in women with  
22 fibromyalgia syndrome. *Physiother Theory Pract*. 2009;25: 555-65.  
23  
24 [30] Soares JJF, Grossi GA. Randomized, Controlled Comparison of Educational  
25 and Behavioural Interventions for Women with Fibromyalgia. *Scand J Occup Ther*.  
26 2002; 9: 35-45.  
27  
28 [31] Mooney Y. A Literature Review: What is the Evidence for the Value of a  
29 Cognitive Behavioural Programme as a Way of Managing Pain, Improving Coping  
30 Skills and Increasing Functionality for Individuals Diagnosed with Fibromyalgia.  
31 *Irish J Occup Ther* 2002; 31: 32-37.  
32  
33 [32] Neal-Boylan L. Update on rheumatology: part 1. *Home Health Nurse*. 2009;  
34 27: 286-296.  
35  
36  
37  
38  
39  
40  
41  
42  
43  
44  
45  
46  
47  
48  
49  
50  
51  
52  
53  
54  
55  
56  
57  
58  
59  
60

1  
2  
3 [33] Gauchard GC, Vançon G, Meyer P, Mainard D, Perrin PP. On the role of knee  
4 joint in balance control and postural strategies: effects of total knee replacement in  
5 elderly subjects with knee osteoarthritis. *Gait Posture* 2010; 32: 155-60.  
6  
7

8  
9  
10 [34] Amris K, Wæhrens EE, Jespersen A, Bliddal H, Danneskiold-Samøe B.  
11 Observation-based assessment of functional ability in patients with chronic  
12 widespread pain: a cross-sectional study. *Pain*. 2011; 152: 2470-76.  
13  
14

15 [35] Hassett AL, Simonelli LE, Radvanski DC, Buyske S, Savage SV, Sigal LH.  
16 The relationship between affect balance style and clinical outcomes in  
17 fibromyalgia. *Arthritis Rheum*. 2008; 59: 833-40.  
18  
19  
20  
21  
22  
23  
24  
25  
26  
27  
28  
29  
30  
31  
32  
33  
34  
35  
36  
37  
38  
39  
40  
41  
42  
43  
44  
45  
46  
47  
48  
49  
50  
51  
52  
53  
54  
55  
56  
57  
58  
59  
60

**TITLES OF TABLES**

**Table 1:** Differences in the values of the sensory organization test (SOT) between women with FM and healthy women

**Table 2:** Linear correlations between clinical pain variables and the SOT balance values in women with FM

**Table 3:** Linear correlations between the clinical pain variables and the SOT strategy values in women with FM

**Table 4:** Correlations between the SOT balance and strategy values and the FIM in women with FM



**Table 1:** Differences in the values of the sensory organization test (SOT) between women with FM and healthy women

|                      | Condition 1#    | Condition 2# | Condition 3# | Condition 4#* | Condition 5#* | Condition 6#* |
|----------------------|-----------------|--------------|--------------|---------------|---------------|---------------|
|                      | <b>Balance</b>  |              |              |               |               |               |
| <b>Women with FM</b> | 93.1 ± 5.4      | 89.7 ± 4.9   | 86.3 ± 7.0   | 76.5 ± 13.4   | 52.1 ± 18.0   | 54.7 ± 19.4   |
| <b>Healthy women</b> | 95.7 ± 1.3      | 92.3 ± 3.4   | 90.7 ± 5.3   | 86.4 ± 9.3    | 68.4 ± 12.6   | 70.8 ± 11.9   |
|                      | <b>Strategy</b> |              |              |               |               |               |
| <b>Women with FM</b> | 98.5 ± 1.6      | 97.3 ± 4.4   | 96.7 ± 3.4   | 85.7 ± 8.1    | 76.1 ± 12.0   | 78.1 ± 7.6    |
| <b>Healthy women</b> | 98.8 ± 0.6      | 98.7 ± 0.7   | 98.3 ± 1.3   | 91.9 ± 3.2    | 81.2 ± 12.7   | 83.1 ± 11.1   |

Data are expressed as means ± Standard Deviation

# Statistically significant differences between patients and controls (P<0.01; ANOVA test)

\* Statistically significant differences between conditions 1-3 (P<0.001; ANOVA test)

Footnote: 1) eyes open, fixed visual surround and fixed support platform; 2) eyes closed, fixed support platform; 3) eyes open, mobile visual surround (moving proportional to the angle of anterior-posterior body sway) and the fixed support platform; 4) eyes open, fixed visual surround and mobile support platform (moving proportional to the angle of anterior-posterior body sway); 5) eyes closed, mobile support platform; and 6) eyes open, mobile visual surround and mobile support platform.

**Table 2:** Linear correlations between clinical pain variables and the SOT balance values in women with FM

|                    | Duration of symptoms      | Current pain              | Best pain                 | Worse pain                |
|--------------------|---------------------------|---------------------------|---------------------------|---------------------------|
| <b>Condition 1</b> | $r_s = 0.124$ ; P = 0.602 | $r_s = 0.276$ ; P = 0.239 | $r_s = 0.242$ ; P = 0.304 | $r_s = 0.169$ ; P = 0.476 |
| <b>Condition 2</b> | $r_s = 0.291$ ; P = 0.213 | $r_s = 0.051$ ; P = 0.830 | $r_s = 0.334$ ; P = 0.149 | $r_s = 0.179$ ; P = 0.450 |
| <b>Condition 3</b> | $r_s = 0.310$ ; P = 0.183 | $r_s = 0.152$ ; P = 0.552 | $r_s = 0.131$ ; P = 0.581 | $r_s = 0.127$ ; P = 0.593 |
| <b>Condition 4</b> | $r_s = 0.308$ ; P = 0.186 | $r_s = 0.084$ ; P = 0.736 | $r_s = 0.076$ ; P = 0.749 | $r_s = 0.07$ ; P = 0.769  |
| <b>Condition 5</b> | $r_s = 0.135$ ; P = 0.571 | $r_s = 0.111$ ; P = 0.642 | $r_s = 0.151$ ; P = 0.526 | $r_s = 0.219$ ; P = 0.354 |
| <b>Condition 6</b> | $r_s = 0.123$ ; P = 0.606 | $r_s = 0.050$ ; P = 0.835 | $r_s = 0.156$ ; P = 0.511 | $r_s = 0.156$ ; P = 0.512 |

$r_s$  = Spearman's correlation test (Spearman's rho)

**Table 3:** Linear correlations between the clinical pain variables and the SOT strategy values in women with FM

|                    | Duration of symptoms       | Current pain               | Best pain                  | Worse pain                 |
|--------------------|----------------------------|----------------------------|----------------------------|----------------------------|
| <b>Condition 1</b> | $r_s = -0.088$ ; P = 0.713 | $r_s = 0.076$ ; P = 0.749  | $r_s = 0.204$ ; P = 0.388  | $r_s = 0.047$ ; P = 0.846  |
| <b>Condition 2</b> | $r_s = 0.124$ ; P = 0.602  | $r_s = -0.032$ ; P = 0.894 | $r_s = -0.399$ ; P = 0.082 | $r_s = -0.210$ ; P = 0.613 |
| <b>Condition 3</b> | $r_s = 0.123$ ; P = 0.604  | $r_s = -0.073$ ; P = 0.759 | $r_s = -0.040$ ; P = 0.867 | $r_s = -0.022$ ; P = 0.926 |
| <b>Condition 4</b> | $r_s = -0.069$ ; P = 0.772 | $r_s = -0.161$ ; P = 0.498 | $r_s = -0.118$ ; P = 0.621 | $r_s = -0.130$ ; P = 0.585 |
| <b>Condition 5</b> | $r_s = 0.036$ ; P = 0.879  | $r_s = 0.046$ ; P = 0.848  | $r_s = -0.140$ ; P = 0.555 | $r_s = 0.380$ ; P = 0.098  |
| <b>Condition 6</b> | $r_s = -0.097$ ; P = 0.685 | $r_s = -0.086$ ; P = 0.718 | $r_s = -0.010$ ; P = 0.966 | $r_s = -0.151$ ; P = 0.525 |

$r_s$  = Spearman's correlation test (Spearman's rho)

**Table 4:** Correlations between the SOT balance and strategy values and the FIM in women with FM

|                     | Balance |         |         |        |        |         | Strategy |        |        |         |        |         |
|---------------------|---------|---------|---------|--------|--------|---------|----------|--------|--------|---------|--------|---------|
|                     | 1       | 2       | 3       | 4      | 5      | 6       | 1        | 2      | 3      | 4       | 5      | 6       |
| Eating              | .280    | .179    | .246    | .251   | .246   | .350*   | .175     | .258   | .185   | .222    | .154   | .222    |
| Grooming            | .316*   | .288    | .308*   | .375** | .428** | .451**  | .002     | .108   | .154   | .423**  | .252   | .423**  |
| Bathing/showering   | .314*   | .469**  | .481**  | .429** | .491** | .541*** | .256     | .434** | .436** | .427**  | .402*  | .427**  |
| Dressing upper body | .311*   | .323*   | .301    | .458** | .343*  | .307*   | .136     | .232   | .313*  | .530**  | .450** | .530*** |
| Dressing lower body | .401**  | .448**  | .336*   | .373** | .351*  | .438**  | .100     | .237   | .336*  | .562*** | .469** | .562*** |
| Toileting           | .251    | .376**  | .258    | .259   | .251   | .483**  | .055     | .223   | .273   | .521**  | .430** | .521*** |
| Bowel management    | -.165   | -.020   | -.131   | .062   | .187   | -.165*  | -.212    | -.076  | -.221  | .141    | .030   | .141    |
| Bladder management  | .064    | -.051   | -.002   | .204   | .083   | .064    | .087     | .061   | .099   | .086    | .303   | .086    |
| Chair-bed transfers | .325*   | .491*** | .510*** | .433** | .451** | .441**  | .220     | .456** | .378** | .389**  | .422** | .389**  |
| Toilet transfers    | .195    | .223    | .282    | .453** | .255   | .197    | .145     | .318*  | .377** | .452**  | .418** | .452**  |
| Bath transfers      | .417*   | .441    | .354    | .321   | .257   | .405    | .257     | .314*  | .351** | .558*** | .407** | .558*** |
| Locomotion          | .110    | -.172   | -.039   | -.009  | -.158  | -.192   | .105     | .132   | .141   | -.133   | .000   | -.133   |
| Stairs              | .365*   | .238    | .079    | .164   | .212   | .164    | .159     | .154   | .050   | .176    | .173   | .176    |
| Comprehension       | .205    | .264    | .311*   | .407** | .270   | .281    | .180     | .375** | .254   | .364**  | .250   | .364**  |
| Expression          | .097    | .095    | .113    | .477** | .247   | .372*   | -.187    | -.108  | -.144  | .306*   | -.061  | .306*   |
| Social interaction  | .285    | .220    | .303    | .212   | .005   | .088    | .239     | .398** | .424** | .269    | .158   | .269    |
| Problem solving     | .192    | .220    | .245    | .307*  | .364*  | .261    | -.018    | .033   | -.006  | .197    | -.008  | .197    |
| Memory              | .311*   | .340*   | .384**  | .468** | .396** | .449**  | .069     | .156   | .314*  | .393**  | .267   | .393**  |

\* P<0.05; \*\* P<0.01; \*\*\* P<0.001

Footnote: 1) eyes open, fixed visual surround and fixed support platform; 2) eyes closed, fixed support platform; 3) eyes open, mobile visual surround (moving proportional to the angle of anterior-posterior body sway) and the fixed support platform; 4) eyes open, fixed visual surround and mobile support platform (moving proportional to the angle of anterior-posterior body sway); 5) eyes closed, mobile support platform; and 6) eyes open, mobile visual surround and mobile support platform.

## STROBE Statement—checklist of items that should be included in reports of observational studies

## Balance deficiencies in women with fibromyalgia assessed using computerized dynamic posturography

|                              | Item No | Recommendation                                                                                                                                                                                                                                                                                                                                                                                                                                                         | Page |
|------------------------------|---------|------------------------------------------------------------------------------------------------------------------------------------------------------------------------------------------------------------------------------------------------------------------------------------------------------------------------------------------------------------------------------------------------------------------------------------------------------------------------|------|
| <b>Title and abstract</b>    | 1       | (a) Indicate the study's design with a commonly used term in the title or the abstract                                                                                                                                                                                                                                                                                                                                                                                 | 2    |
|                              |         | (b) Provide in the abstract an informative and balanced summary of what was done and what was found                                                                                                                                                                                                                                                                                                                                                                    | 2    |
| <b>Introduction</b>          |         |                                                                                                                                                                                                                                                                                                                                                                                                                                                                        |      |
| Background/rationale         | 2       | Explain the scientific background and rationale for the investigation being reported                                                                                                                                                                                                                                                                                                                                                                                   | 3-4  |
| Objectives                   | 3       | State specific objectives, including any prespecified hypotheses                                                                                                                                                                                                                                                                                                                                                                                                       | 4    |
| <b>Methods</b>               |         |                                                                                                                                                                                                                                                                                                                                                                                                                                                                        |      |
| Study design                 | 4       | Present key elements of study design early in the paper                                                                                                                                                                                                                                                                                                                                                                                                                | 4    |
| Setting                      | 5       | Describe the setting, locations, and relevant dates, including periods of recruitment, exposure, follow-up, and data collection                                                                                                                                                                                                                                                                                                                                        | 4    |
| Participants                 | 6       | (a) <i>Cohort study</i> —Give the eligibility criteria, and the sources and methods of selection of participants. Describe methods of follow-up<br><i>Case-control study</i> —Give the eligibility criteria, and the sources and methods of case ascertainment and control selection. Give the rationale for the choice of cases and controls<br><i>Cross-sectional study</i> —Give the eligibility criteria, and the sources and methods of selection of participants | 4-5  |
|                              |         | (b) <i>Cohort study</i> —For matched studies, give matching criteria and number of exposed and unexposed<br><i>Case-control study</i> —For matched studies, give matching criteria and the number of controls per case                                                                                                                                                                                                                                                 |      |
| Variables                    | 7       | Clearly define all outcomes, exposures, predictors, potential confounders, and effect modifiers. Give diagnostic criteria, if applicable                                                                                                                                                                                                                                                                                                                               | 7-8  |
| Data sources/<br>measurement | 8*      | For each variable of interest, give sources of data and details of methods of assessment (measurement). Describe comparability of assessment methods if there is more than one group                                                                                                                                                                                                                                                                                   |      |
| Bias                         | 9       | Describe any efforts to address potential sources of bias                                                                                                                                                                                                                                                                                                                                                                                                              |      |
| Study size                   | 10      | Explain how the study size was arrived at                                                                                                                                                                                                                                                                                                                                                                                                                              | 8-9  |
| Quantitative variables       | 11      | Explain how quantitative variables were handled in the analyses. If applicable, describe which groupings were chosen and why                                                                                                                                                                                                                                                                                                                                           | 8    |
| Statistical methods          | 12      | (a) Describe all statistical methods, including those used to control for confounding                                                                                                                                                                                                                                                                                                                                                                                  | 8    |
|                              |         | (b) Describe any methods used to examine subgroups and interactions                                                                                                                                                                                                                                                                                                                                                                                                    | 8    |
|                              |         | (c) Explain how missing data were addressed                                                                                                                                                                                                                                                                                                                                                                                                                            |      |
|                              |         | (d) <i>Cohort study</i> —If applicable, explain how loss to follow-up was addressed<br><i>Case-control study</i> —If applicable, explain how matching of cases and controls was addressed<br><i>Cross-sectional study</i> —If applicable, describe analytical methods taking account of sampling strategy                                                                                                                                                              |      |
|                              |         | (e) Describe any sensitivity analyses                                                                                                                                                                                                                                                                                                                                                                                                                                  |      |

| <b>Results</b>           |     |                                                                                                                                                                                                              |       |
|--------------------------|-----|--------------------------------------------------------------------------------------------------------------------------------------------------------------------------------------------------------------|-------|
| Participants             | 13* | (a) Report numbers of individuals at each stage of study—eg numbers potentially eligible, examined for eligibility, confirmed eligible, included in the study, completing follow-up, and analysed            | 8-9   |
|                          |     | (b) Give reasons for non-participation at each stage                                                                                                                                                         | 9     |
|                          |     | (c) Consider use of a flow diagram                                                                                                                                                                           |       |
| Descriptive data         | 14* | (a) Give characteristics of study participants (eg demographic, clinical, social) and information on exposures and potential confounders                                                                     | 8-9   |
|                          |     | (b) Indicate number of participants with missing data for each variable of interest                                                                                                                          | 9     |
|                          |     | (c) <i>Cohort study</i> —Summarise follow-up time (eg, average and total amount)                                                                                                                             |       |
| Outcome data             | 15* | <i>Cohort study</i> —Report numbers of outcome events or summary measures over time                                                                                                                          |       |
|                          |     | <i>Case-control study</i> —Report numbers in each exposure category, or summary measures of exposure                                                                                                         |       |
|                          |     | <i>Cross-sectional study</i> —Report numbers of outcome events or summary measures                                                                                                                           | 9-10  |
| Main results             | 16  | (a) Give unadjusted estimates and, if applicable, confounder-adjusted estimates and their precision (eg, 95% confidence interval). Make clear which confounders were adjusted for and why they were included | 8     |
|                          |     | (b) Report category boundaries when continuous variables were categorized                                                                                                                                    |       |
|                          |     | (c) If relevant, consider translating estimates of relative risk into absolute risk for a meaningful time period                                                                                             |       |
| Other analyses           | 17  | Report other analyses done—eg analyses of subgroups and interactions, and sensitivity analyses                                                                                                               |       |
| <b>Discussion</b>        |     |                                                                                                                                                                                                              |       |
| Key results              | 18  | Summarise key results with reference to study objectives                                                                                                                                                     | 10-11 |
| Limitations              | 19  | Discuss limitations of the study, taking into account sources of potential bias or imprecision. Discuss both direction and magnitude of any potential bias                                                   | 12    |
| Interpretation           | 20  | Give a cautious overall interpretation of results considering objectives, limitations, multiplicity of analyses, results from similar studies, and other relevant evidence                                   | 12-13 |
| Generalisability         | 21  | Discuss the generalisability (external validity) of the study results                                                                                                                                        | 12    |
| <b>Other information</b> |     |                                                                                                                                                                                                              |       |
| Funding                  | 22  | Give the source of funding and the role of the funders for the present study and, if applicable, for the original study on which the present article is based                                                | 1     |

\*Give information separately for cases and controls in case-control studies and, if applicable, for exposed and unexposed groups in cohort and cross-sectional studies.

**Note:** An Explanation and Elaboration article discusses each checklist item and gives methodological background and published examples of transparent reporting. The STROBE checklist is best used in conjunction with this article (freely available on the Web sites of PLoS Medicine at <http://www.plosmedicine.org/>, Annals of Internal Medicine at <http://www.annals.org/>, and Epidemiology at <http://www.epidem.com/>). Information on the STROBE Initiative is available at [www.strobe-statement.org](http://www.strobe-statement.org).

# BMJ Open

## Balance deficiencies in women with fibromyalgia assessed using computerized dynamic posturography: a cross-sectional study in Spain

|                                 |                                                                                                                                                                                                                                                                                                                                                                                                                                                                                                                                                                                                                                                                                                                                                                                                                                                                                                                                                                                                                                                                                                 |
|---------------------------------|-------------------------------------------------------------------------------------------------------------------------------------------------------------------------------------------------------------------------------------------------------------------------------------------------------------------------------------------------------------------------------------------------------------------------------------------------------------------------------------------------------------------------------------------------------------------------------------------------------------------------------------------------------------------------------------------------------------------------------------------------------------------------------------------------------------------------------------------------------------------------------------------------------------------------------------------------------------------------------------------------------------------------------------------------------------------------------------------------|
| Journal:                        | <i>BMJ Open</i>                                                                                                                                                                                                                                                                                                                                                                                                                                                                                                                                                                                                                                                                                                                                                                                                                                                                                                                                                                                                                                                                                 |
| Manuscript ID                   | bmjopen-2017-016239.R1                                                                                                                                                                                                                                                                                                                                                                                                                                                                                                                                                                                                                                                                                                                                                                                                                                                                                                                                                                                                                                                                          |
| Article Type:                   | Research                                                                                                                                                                                                                                                                                                                                                                                                                                                                                                                                                                                                                                                                                                                                                                                                                                                                                                                                                                                                                                                                                        |
| Date Submitted by the Author:   | 07-Apr-2017                                                                                                                                                                                                                                                                                                                                                                                                                                                                                                                                                                                                                                                                                                                                                                                                                                                                                                                                                                                                                                                                                     |
| Complete List of Authors:       | <p>Perez-de-Heredia, Marta; Universidad Rey Juan Carlos, Physiotherapy, Occupational Therapy, Rehabilitation and Physical Medicine.<br/>           Huertas-Hoyas, Elisabet; Universidad Rey Juan Carlos Facultad de Ciencias de la Salud, Physical Therapy, Occupational Therapy, Rehabilitation and Physical Medicine<br/>           Martínez-Piedrola, Rosa; Universidad Rey Juan Carlos, Physiotherapy, Occupational Therapy, Rehabilitation and Physical Medicine.<br/>           Palacios-Cena, Domingo; Univ Rey Juan Carlos, Physical Therapy, Occupational Therapy, Rehabilitation and Physical Medicine; Universidad Rey Juan Carlos,<br/>           Alegre-Ayala, Jorge; Universidad Rey Juan Carlos Facultad de Ciencias de la Salud, Physical Therapy, Occupational Therapy, Rehabilitation and Physical Medicine<br/>           Santamaría Vázquez, Montserrat; Universidad de Burgos<br/>           Fernández de las Peñas, Cesar; Universidad Rey Juan Carlos Facultad de Ciencias de la Salud, Physical Therapy, Occupational Therapy, Rehabilitation and Physical Medicine</p> |
| <b>Primary Subject Heading</b>: | Rheumatology                                                                                                                                                                                                                                                                                                                                                                                                                                                                                                                                                                                                                                                                                                                                                                                                                                                                                                                                                                                                                                                                                    |
| Secondary Subject Heading:      | Occupational and environmental medicine, Rehabilitation medicine                                                                                                                                                                                                                                                                                                                                                                                                                                                                                                                                                                                                                                                                                                                                                                                                                                                                                                                                                                                                                                |
| Keywords:                       | Postural Balance, Fibromyalgia, Patient Positioning                                                                                                                                                                                                                                                                                                                                                                                                                                                                                                                                                                                                                                                                                                                                                                                                                                                                                                                                                                                                                                             |
|                                 |                                                                                                                                                                                                                                                                                                                                                                                                                                                                                                                                                                                                                                                                                                                                                                                                                                                                                                                                                                                                                                                                                                 |

SCHOLARONE™  
Manuscripts

1  
2  
3  
4  
5  
6  
7  
8  
9  
10  
11  
12  
13  
14  
15  
16  
17  
18  
19  
20  
21  
22  
23  
24  
25  
26  
27  
28  
29  
30  
31  
32  
33  
34  
35  
36  
37  
38  
39  
40  
41  
42  
43  
44  
45  
46  
47  
48  
49  
50  
51  
52  
53  
54  
55  
56  
57  
58  
59  
60

## Balance deficiencies in women with fibromyalgia assessed using computerized dynamic posturography: a cross-sectional study in Spain

- Marta Pérez-de-Heredia-Torres<sup>1</sup>, PhD, Occupational therapist. Avenida de Atenas s/n. CP.28922, Alcorcón, Madrid. Tel. +34914888886. Fax: +34914888957.  
[marta.perezdeheredia@urjc.es](mailto:marta.perezdeheredia@urjc.es)
- Elisabet Huertas-Hoyas<sup>1</sup>, PhD, Occupational therapist. Avenida de Atenas s/n. CP.28922, Alcorcón, Madrid. Tel. +34914889023. Fax: +3491488 89 57. [elisabet.huertas@urjc.es](mailto:elisabet.huertas@urjc.es)
- M<sup>a</sup> Rosa Martínez-Piédrola<sup>1</sup>, PhD, Occupational therapist. Avenida de Atenas s/n. CP.28922, Alcorcón, Madrid. Tel. +34914888887. Fax: +3491488 89 57. [rosa.martinez@urjc.es](mailto:rosa.martinez@urjc.es)
- Domingo Palacios-Ceña<sup>1</sup>, PhD, Nurse. Avenida de Atenas s/n. CP.28922, Alcorcón, Madrid. Tel. +34914888883. Fax: +3491488 89 57. [domingo.palacios@urjc.es](mailto:domingo.palacios@urjc.es)
- Jorge Alegre-Ayala<sup>1</sup>, PhD, Occupational therapist. Avenida de Atenas s/n. CP.28922, Alcorcón, Madrid. Tel. +34914889023. Fax: +3491488 89 57. [jorge.alegre@urjc.es](mailto:jorge.alegre@urjc.es)
- Montserrat Santamaría-Vázquez<sup>2</sup>, PhD, Occupational therapist. Paseo Comendadores s/n. CP.09001. [msvazquez@ubu.es](mailto:msvazquez@ubu.es)
- César Fernández-de-las-Peñas<sup>1</sup>, PhD, Physical therapist. Avenida de Atenas s/n. CP.28922, Alcorcón, Madrid. Spain. Tel. +34 914888884. Fax: +34914888957.  
[cesar.fernandez@urjc.es](mailto:cesar.fernandez@urjc.es)

<sup>1</sup> Department of Physical Therapy, Occupational Therapy, Physical Medicine and Rehabilitation, Universidad Rey Juan Carlos, Alcorcón, Spain.

<sup>2</sup> Health Sciences Department. Burgos University, Burgos, Spain.

### Corresponding author:

Elisabet Huertas Hoyas,

Rey Juan Carlos University. Health Sciences Faculty.

Email: [elisabet.huertas@urjc.es](mailto:elisabet.huertas@urjc.es)



## ABSTRACT

**Objectives:** Our aims were: 1) to compare the sensory organization of balance control and balance strategies between women with fibromyalgia (FM) and healthy women; 2) to investigate which sensory component, i.e., vestibular, visual or somato-sensory, is the most affected in FM; and, 3), to determine the associations between the functional independence measure (FIM) and balance responses in FM. **Design:** Cross-sectional observational study. **Setting:** Urban regional hospital and university (Universidad Rey Juan Carlos, Madrid, Spain). **Participants:** Twenty women with FM and 20 matched healthy women. **Primary/secondary outcome measures:** The Sensory Organization Test (SOT) was used to determine postural sway and balance during six different conditions with subjects in a standing position. The Functional Independence Measure (FIM) was used to determine the level of functional independence in daily life activities. Between-group differences were analyzed with ANCOVA and the Spearman's test was used for correlations. **Results:** Significant between-groups and between-conditions differences were found for all SOT conditions (all,  $P < 0.001$ ): women with FM showed lower scores being the vestibular score the most affected. Different correlations between SOT conditions and some specific daily life activities were observed in the FM group: bathing activity and balance condition 6 ( $r_s = 0.541$ ;  $P < 0.001$ ), bed transfers activity and conditions 2 ( $r_s = 0.491$ ;  $P < 0.001$ ) and 3 ( $r_s = 0.510$ ;  $P < 0.001$ ), positioning strategy 6 and dressing the upper ( $r_s = 0.530$ ;  $P < 0.001$ ) or lower ( $r_s = 0.562$ ;  $P < 0.001$ ) body, and toileting ( $r_s = 0.521$ ;  $P < 0.001$ ): the greater the loss of balance, the greater the interference on some daily life activities. **Conclusions:** Women with FM exhibited balance deficiencies and used different strategies for maintaining their balance in standing which was associated with a negative impact on functional independence.

**KEY WORDS:** Postural Balance, Fibromyalgia, Patient Positioning.

**Strengths and limitations of this study:**

- This is the first study investigating the association between postural balance and functional interference with activity daily living.
- The sample size was relatively small and from the same regional hospital.
- We only included women, but not men, diagnosed with fibromyalgia.

## INTRODUCTION

Fibromyalgia (FM) is a chronic syndrome that has a considerable functional impact on patients. It is estimated that between 10-15% of the general population is affected by this syndrome in Europe<sup>1</sup>. The main complaint is generalized long-lasting muscle pain which is typically described as deep and intense and worsening with intense physical exercise, cold and/or emotional mental stress. This widespread pain is accompanied by other symptoms including asthenia, fatigue and non-restorative sleep together with other poorly defined symptoms<sup>2</sup>. Individuals with FM can also present muscle asymmetry<sup>3</sup> and difficulty for relaxing the muscles<sup>4</sup> which can contribute to fatigue and pain, leading to posture and balance deficit. In fact, balance problems are among the most debilitating symptoms reported by patients with FM.<sup>5,6</sup> Additionally, postural disturbances affecting the vertebral column have been also found<sup>7</sup> as well as lower spatio-temporal parameters during gait<sup>8</sup> and a higher risk of falls<sup>9-11</sup>. Finally, FM can be associated with general inactivity<sup>12</sup> which can lead to negative effects on the functional capacity of the patient.

Postural control requires the appropriate integration of sensory, visual, vestibular and somatosensory information into the central nervous system (mainly integrated by proprioceptive and cutaneous sensitivity). Posturography is a technique that enables a quantitative assessment of postural control by studying the displacements of the center of pressure in different circumstances simulating actions from normal daily life<sup>13</sup>. This technique itself does not enable a diagnosis; however, it provides information regarding functional status and is can be of value for guiding treatment.

Some of the most utilized tests in posturography include the Sensory Organization Test (SOT), the motor control test and the adaptation test<sup>14</sup>. The SOT enables isolation of components from the vestibular, visual and somatosensory systems that participate in the maintenance of postural control, enabling users to determine the site of the main

1  
2  
3 disorder causing the loss of balance<sup>15</sup>. Some previous studies have reported the presence  
4  
5 of balance and postural control deficits in women with FM using different procedures<sup>16-</sup>  
6  
7<sup>18</sup>. Muto et al<sup>17</sup> observed that patients with FM exhibited impaired postural control, e.g.,  
8  
9 increased speed of oscillation of the center of gravity and lower balance self-efficacy as  
10  
11 assessed with the modified clinical test of sensory interaction on balance (mCTSIB) and  
12  
13 the balance self-efficacy (ABC scale). In this study, impaired postural control and low  
14  
15 balance self-efficacy were associated with pain severity and muscle strength<sup>17</sup>. Jones et  
16  
17 al<sup>16</sup> found that FM patients showed lower scores in almost all conditions of the SOT and  
18  
19 an increased number of falls. In this study, postural stability was associated to related  
20  
21 disability, cognitive impairment and body mass index, but not to medication intake, pain  
22  
23 severity or muscle strength<sup>16</sup>. In a pilot study using the SOT, Russek and Fulk<sup>18</sup> reported  
24  
25 that 34% of FM subjects scored below the fifth percentile for population normative data  
26  
27 in some SOT conditions. These authors also found a negative association between the  
28  
29 somato-sensory score of the SOT and FM-related disability<sup>18</sup>. Although these studies  
30  
31 support the occurrence of balance problems in patients with FM using the SOT, they did  
32  
33 not investigate the association of balance disturbances with functional independence in  
34  
35 activities of daily living (ADLs). The identification of an association between balance  
36  
37 problems and ADL disturbances can help clinicians for developing specific therapeutic  
38  
39 strategies for patients with FMS. To the best of the author's knowledge, no study has  
40  
41 previously investigated this association in patients with FM.  
42  
43  
44  
45  
46

47 Therefore, the aims of the current study were: 1) to compare sensory organization of  
48  
49 balance control and balance strategies between women with FM and healthy controls; 2)  
50  
51 to investigate which sensory component (vestibular, visual or somato-sensory) is the  
52  
53 most affected in FM women; and, 3), to determine the potential association between the  
54  
55 functional independence measure (FIM) and balance responses in women with FM.  
56  
57  
58  
59  
60

## METHODS

### Research Design

A cross-sectional study was performed. We conducted non-probabilistic sampling of consecutive cases, where subjects who met the established criteria were included. The study was conducted during the second semester of 2015.

### Participants

Advertisements were placed in local newspapers in order to recruit healthy women from the general population for acting as control group. Participants were considered as healthy controls if they reported: no spontaneous pain symptoms at the moment of the study, no history of chronic pain (lasting more than 3 months), no pain experienced during the previous year prior to the study, no pain-related diagnoses and participants who were not taking antidepressant or analgesic medication.

Women with diagnosis of FM were recruited from the Department of Rheumatology at the Hospital Fundación Alcorcón (Spain). An experienced rheumatologist confirmed the FM diagnosis based on a combination of both American College of Rheumatology criteria (1990/m2010)<sup>19,20</sup>. It has been suggested that a combination of 1990 and m2010 criteria is recommended since it had the best diagnostic features<sup>21,22</sup>. Tender points were tested by digital palpation at the 18 sites according to the ACR protocol<sup>19</sup>. Participants were asked to indicate whether they experienced pain in response to a pressure of approximately 4 kg exerted by the examiner<sup>19</sup>. Further, the presence of fatigue, altered sleep patterns and other sensory symptoms self-perceived by the patient was recorded<sup>20</sup>. Face-to-face structured medical interviews were performed to determine the time of the diagnosis, socio-demographic and clinical data, current medication intake and presence of psychiatric disorders.

1  
2  
3 Exclusion criteria for both groups included: 1) co-morbid medical diagnoses, e.g.,  
4 cardiopulmonary disorders, inflammatory disease, obesity, and other diagnoses; 2)  
5  
6  
7 malignancy; 3) psychiatric illnesses diagnosis, e.g. schizophrenia or substance abuse; 4)  
8  
9  
10 depression (Beck Depression Inventory-II >8 points); 5) previous history of surgery; 6)  
11  
12 previous history of whiplash; 7) uncontrolled endocrine disorders (i.e. hyper- or hypo-  
13  
14 thyroidism, diabetes); or 8) pregnancy.

15  
16 Participants were matched on the basis of their age and hand dominance to gain  
17  
18 homogeneity in the sample during the performance of those ADLs involving the upper  
19  
20 extremity. Hand dominance was determined by self-reports regarding the hand used for  
21  
22 writing.  
23

### 24 25 **Ethical considerations**

26  
27 The current study was conducted in accordance with the ethical standards of the  
28  
29 Declaration of Helsinki and was reviewed and approved by the Ethics committee of the  
30  
31 Hospital Fundación Alcorcón (protocol FHA-URJC 032). All subjects provided written  
32  
33 informed consent.  
34

### 35 36 **Study procedure**

37  
38 The study protocol for the SOT was the same for all participants. In addition, women  
39  
40 with FM also fulfilled the Spanish version of the Fibromyalgia Impact Questionnaire  
41  
42 (FIQ)<sup>23</sup> to assess FM-related disability<sup>24</sup>. All participants were verbally informed of the  
43  
44 study, accepted the informed consent, and were familiarized with the different outcomes  
45  
46 before starting data collection.  
47  
48

49  
50 First, the SOT protocol was performed and subsequently participants completed the  
51  
52 remaining assessments. All assessments were performed at a similar time of the day in  
53  
54 the Laboratory for Movement analysis, Biomechanics, Ergonomics and MOtor Control  
55  
56  
57  
58  
59  
60

(LAMBECOM) located at the Department of Physical Therapy, Occupational Therapy, Rehabilitation and Physical Medicine, Universidad Rey Juan Carlos (Spain).

The Functional Independence Measure (FIM) assessment took place in a suitably equipped apartment, via observation of subject's functional independence demonstrated during the performance of ADL contained in the scale. An external evaluator, blinded to the participant's condition, performed the assessments.

## **Outcome measures**

### ***Functional independence measure (FIM)***

The FIM provides an assessment of the level of functional independence in daily life activities<sup>25</sup>. It also provides information primarily on cognitive and motor performance via 18 items. Scores range from 1-7, with higher scores corresponding to a higher level of functional independence. The possible score ranges from 18 to 126 points. The FIM includes observation and face-to-face interviews. This tool has demonstrated excellent psychometric properties<sup>26-28</sup>.

### ***Sensory Organization Test (SOT)***

The posturography device used in the current study was the SOT assessment, which belongs to the Smart Balance Master©, by Neurocom® EQ0501, International, Inc (Oregon USA)<sup>29,30</sup>. The device consists of a platform connected to symmetrically placed transducers measuring the vertical and horizontal shear forces exercised through the anterior-posterior axis in the plane parallel to the floor. It is also equipped with a mobile visual surround screen. Both the visual surround and platform are computer-controlled and can move simultaneously. This device was connected to a PC Pentium I, with Smart Balance Master 5.0 software and a Samsung® monitor. The reports obtained for each participant were saved on the computer's hard drive.

1  
2  
3 To conduct the SOT, an individual's postural sway, and thereby balance is measured  
4 under 6 different conditions during standing. During these tests, the base of support and  
5 the visual surround screen can move according to the patient's balancing responses and  
6 the strategy used for maintaining an upright position. For instance, no altered stimuli are  
7 given in condition 1; whereas visual information is removed in condition 2, by asking  
8 the participant to close the eyes. In condition 3, the visual surround is moving with the  
9 subject's anterior-posterior body sway, whereas in condition 4, the platform rotates with  
10 the subject's anterior-posterior body sway. In condition 5, subjects close their eyes and  
11 the platform moves with the subject anterior-posterior body sway. Finally, in condition  
12 6, the visual screen and the platform are moved with the subject's anterior-posterior  
13 body sway. Briefly, the 6 conditions can be resumed as follows: 1) eyes open, fixed  
14 surround and support platform; 2) eyes closed, fixed surround and support platform; 3)  
15 eyes open, moving surround (moving proportional to the angle of anterior-posterior  
16 body sway) and fixed support platform; 4) eyes open, fixed surround and moving  
17 support platform (moving proportional to the angle of anterior-posterior body sway); 5)  
18 eyes closed, fixed surround and moving support platform; and 6) eyes open, moving  
19 surround and support platform. Tests were always performed following these steps in  
20 order. Each condition was performed 3 consecutive times and the mean was considered  
21 in the analysis. In total, the duration of the tests lasted approximately 12 minutes for  
22 each patient; therefore, it can be considered a non-fatiguing assessment. This procedure  
23 has shown good test-retest reliability in healthy people<sup>31</sup>.

24  
25  
26  
27  
28  
29  
30  
31  
32  
33  
34  
35  
36  
37  
38  
39  
40  
41  
42  
43  
44  
45  
46  
47  
48  
49 Participants were encouraged to maintain their stability and center of gravity, despite  
50 the movement of the visual surround or the base of support. The participant's center of  
51 gravity was displayed on the upper half of the screen. The feet were correctly positioned  
52 facing the visual surround during the entire test. If the participant fell, took a step or  
53  
54  
55  
56  
57  
58  
59  
60



1  
2  
3 touched the visual surround, the test was interrupted and the fall was registered. Data  
4  
5 assessments were performed automatically and compared with theoretical normative  
6  
7 electronic data. The score of each condition consist of a percentage that compares the  
8  
9 subject anterior-posterior center of pressure sway with the theoretical limits of stability.  
10  
11 The score is registered on a bar chart ranging from 0% to 100% where 0% represents  
12  
13 the least stable (fall) and 100% indicates perfect stability<sup>29</sup>.  
14  
15

16  
17 In addition, combination of the results obtained in the different conditions provides a  
18  
19 ratio score of each sensory system (somato-sensory, vestibular, or visual). The somato-  
20  
21 sensory ratio (condition 2/condition 1) determines how successfully a person uses input  
22  
23 from the somato-sensory system for balance; the visual ratio (condition 4/condition 1)  
24  
25 determines how successfully a person uses visual system for balance; and the vestibular  
26  
27 ratio (condition 5/condition 1) determines how successfully a person uses input from the  
28  
29 vestibular system for balance.  
30  
31

32 Finally, a strategy score for each SOT condition is also calculated with scores near  
33  
34 100 indicating use of an ankle strategy and scores near 0 indicating a hip strategy  
35  
36

### 37 **Sample Size Calculation**

38 The sample size was calculated using the Ene 3.0 software (Autonomic University of  
39  
40 Barcelona, Spain). The sample calculation was based on detecting significant moderate  
41  
42 correlations ( $r=0.60$ ) between the SOT conditions and FIM variables with an alpha level  
43  
44 ( $\alpha$ ) of 0.05, and a desired power ( $\beta$ ) of 90%. This generated a sample size of at least 19  
45  
46 subjects.  
47  
48

### 49 **Statistical Analysis**

50 The SPSS statistical package was used for data analysis (version 19.0, SPSS Inc,  
51  
52 Chicago, IL, USA). The Kolmogorov-Smirnov test was used to analyze the normal  
53  
54 distribution of the variables ( $P>0.05$ ). Quantitative data without a normal distribution  
55  
56  
57  
58  
59  
60

(clinical data and FIM scores) were analyzed with non-parametric tests and those data with a normal distribution (SOT conditions) were analyzed with parametric tests. A 2x6 analysis of variance (ANCOVA) with group (FM or controls) as a between-subjects factor and with condition of the SOT (from 1 to 6) as a within-subjects factor was and body mass index as covariate used to analyze differences in the assessments of balance responses and strategies used for maintaining the upright position in the SOT. The main hypothesis of interest was the Group \* Condition interaction. Further, unpaired Student t-tests were also conducted to determine between-groups difference for the ratio score of each sensory system (somato-sensory, vestibular, or visual). Finally, the Spearman's rho (rs) test was used to analyze potential associations between the clinical variables related to symptoms, disability, FIM and SOT conditions in the FM group. The statistical analysis was conducted at a 95% confidence level; but, we corrected for multiple comparisons using the Holm-Bonferroni adjustment<sup>32</sup> assuming a significant alpha level of 0.008 (6 independent-samples t-tests by condition).

## RESULTS

### Demographic and clinical data

Twenty-nine (n =29) women with FM were screened for eligibility criteria between January and November 2015. Nine women were excluded as follows: previous surgery (n=3), whiplash syndrome (n=2), pregnancy (n=2), diabetes (n=1) and litigation (n=1). The final sample consisted of 20 women with FM aged 35-55 years old (mean: 48±6 years) who satisfied all the eligibility criteria and agreed to participate. In addition, 20 matched healthy women; aged 35-56 years old (mean: 47±6 years) were also included. There were no significant differences in age (P=0.909) or body mass index (control: 23.8 ±1.3; FM: 24.2±1.5, P=0.508) between both groups. All participants were right-

1  
2  
3 handed. Seventeen (85%) women with FM (85%) were regularly taking non-steroidal  
4 anti-inflammatory medications. The FIQ revealed a moderate disability with a mean  
5 score of 57.9 (95%CI 53.1-62.6). All participants completed the assessments and  
6 therefore there were no missing data.  
7  
8  
9

### 10 11 **Fibromyalgia and SOT**

12  
13  
14 The ANCOVA revealed significant differences between groups ( $F=21.634$ ;  $P<0.001$ )  
15 and conditions ( $F=45.164$ ;  $P<0.001$ ) for the balance responses on the SOT: women with  
16 FM displayed significantly ( $P=0.005$ ) lower values in all SOT conditions than healthy  
17 women and scores of conditions 4-6 were significantly lower ( $P=0.007$ ) than those for  
18 conditions 1-3 (table 1). A significant Group \* Condition interaction was also observed  
19 ( $F=3.404$ ;  $P=0.006$ ): differences between conditions 4-6 scores and conditions 1-3 were  
20 significantly more pronounced within the FM group. No effect of the body mass index  
21 was observed ( $F=1.144$ ;  $P=0.338$ ).  
22  
23  
24  
25  
26  
27  
28  
29  
30

31 We found significant ( $t=2.901$ ;  $P=0.006$ ) lower vestibular ratio score in women with  
32 FM (mean:  $0.55\pm 0.2$ ) as compared to healthy women (mean:  $0.72\pm 0.15$ ). No significant  
33 differences in somato-sensory ( $t=0.011$ ;  $P=0.989$ ) and visual ( $t=1.900$ ;  $P=0.065$ ) ratios  
34 between women with FM (somato-sensory:  $0.95\pm 0.03$ ; visual:  $0.82\pm 0.15$ ) and healthy  
35 women (somato-sensory:  $0.96\pm 0.03$ ; visual:  $0.90\pm 0.1$ ) were observed.  
36  
37  
38  
39  
40  
41  
42

43 ***[Insert table 1 about here]***

44  
45 The ANCOVA also revealed significant between-groups ( $F=10.456$ ;  $P<0.001$ )  
46 and between-conditions ( $F=35.301$ ;  $P<0.001$ ) differences for the balance strategies used  
47 during the SOT conditions: FM women displayed significantly lower values ( $P<0.001$ )  
48 in all conditions than healthy women (table 1) suggesting a greater use of the hip instead  
49 the ankle. Again, scores on conditions 4-6 were lower than those values for conditions  
50  
51  
52  
53  
54  
55  
56  
57  
58  
59  
60

1  
2  
3 1-3 ( $P<0.001$ ). No significant Group x Condition interaction ( $F=1.170$ ;  $P=0.325$ ) or  
4  
5 effect of the body mass index ( $F=0.608$ ;  $P=0.770$ ) was observed.  
6

### 7 **Correlations between clinical variables and SOT conditions in fibromyalgia**

8  
9 Within the group of women with FM, no significant correlation was found between  
10 the duration (years) of neither pain nor the intensity of the symptoms with any of the  
11 SOT conditions. Table 2 displays correlation coefficients and the statistical significance  
12 for all conditions in the balance section, whereas table 3 displays the same data for each  
13 condition within the strategy section.  
14  
15  
16  
17  
18  
19

20  
21 *[Insert table 2 about here]*

22  
23 *[Insert table 3 about here]*

### 24 **Correlations between functionality and SOT conditions**

25  
26 Positive correlations between different SOT conditions and different ADLs variables  
27 were found in the group of women with FM (table 4). The balance condition N°6 (eyes  
28 open, mobile visual surround-mobile platform) was moderately associated with bathing  
29 activity ( $r_s=0.541$ ;  $P<0.001$ ) whereas conditions 2 and 3 were positively and moderately  
30 associated with bed transfers activity ( $r_s=0.491$ ;  $P<0.001$ ; and  $r_s=0.510$ ;  $P<0.001$ ,  
31 respectively): the lower the score balance in these conditions, the poorer the function in  
32 the respective ADLs.  
33  
34  
35  
36  
37  
38  
39  
40  
41  
42

43 *[Insert table 4 about here]*

44  
45 Similarly, significant positive correlations were found between positioning strategy  
46 number 6 and the following ADLs: dressing upper body ( $r_s=0.530$ ;  $P<0.001$ ), dressing  
47 the lower body ( $r_s=0.562$ ;  $P<0.001$ ) and toileting ( $r_s=0.521$ ;  $P<0.001$ ): the worse the  
48 balance strategy, the greater interference with functional independence in these ADL.  
49  
50  
51  
52  
53  
54  
55  
56  
57  
58  
59  
60

## DISCUSSION

The current study found that women with FM exhibit worse balance scores compared to healthy women as assessed with the SOT, in agreement with previous studies<sup>16,18</sup>. In fact, differences were higher with the eyes closed and moving surroundings surfaces. Further, the strategy used for stabilizing the ankle joint was poor in women with FM. Nevertheless, the most significant contribution of the current study was the association of balance scores with functional independence during ADL.

Women with FM exhibited lower scores in all SOT conditions compared to healthy women suggesting poor balance. Our results agree with those previously observed by Jones et al<sup>16</sup> and Russek and Fulk<sup>18</sup> who also reported significantly lower scores in all SOT conditions in individuals with FM. It is interesting to note that the scores observed in our study were similar to those reported in these previous studies<sup>16,18</sup>. Current and previous evidence would suggest that subjects with FM exhibit poor general balance as compared to healthy women. Nevertheless, although all SOT conditions showed lower scores in FM, the vestibular ratio was the most significantly impaired in our sample of women with FM. This may be related to the fact that scores in the last SOT conditions (4 to 6) were significantly much lower in the FM group than in the healthy group. As previously suggested, lower scores in conditions 4 to 6 compared to conditions 1 to 3 suggest a degree of somato-sensory dependence<sup>15</sup>. This hypothesis is in line with the study by De Brujin et al<sup>33</sup> who found that balance in patients with FM was more optimal on firm and regular surfaces. In fact, Russek and Fulk<sup>18</sup> and the current study did not find significant differences within the somato-sensory system ratio between individuals with FM and healthy people, suggesting that it is the vestibular, and probably the visual, system<sup>16,18</sup> the most affected in this population.

1  
2  
3 To determine the mechanisms related to poor balance in patients with FM is beyond  
4 the scope of the current study, but some hypotheses have been proposed. Since FM is  
5 characterized by abnormal nociceptive processing, it is possible that multiple processing  
6 disturbances may lead to poor balance. Additionally, other processing abnormalities of  
7 the central nervous system, e.g., cognitive dysfunction, could also contribute to postural  
8 instability. In fact, Bayazit et al<sup>34</sup> suggested that women with FM have neural brainstem  
9 disintegration which could lead to abnormal perception of audio-vestibular inputs and to  
10 abnormal auditory brainstem response. Current and previous finding demonstrating that  
11 the vestibular system was the most affected in individuals with FM would support this  
12 hypothesis. Nevertheless, since we did not specifically evaluate the function of the  
13 vestibular system in our sample of women with FM, the current results do not permit to  
14 determine whether the low scores on the vestibular component of the SOT were due to  
15 peripheral or central deficits.  
16  
17  
18  
19  
20  
21  
22  
23  
24  
25  
26  
27  
28  
29  
30

31  
32 Additionally to lower balance scores, we also observed that our sample of women  
33 with FM also used different strategy than healthy women for maintaining their balance.  
34 The SOT strategy scores indicate that woman with FM use a hip strategy to maintain  
35 their balance whereas healthy women use a more ankle strategy. Some possible reasons  
36 for these changes in balance strategy can be the presence of muscle trigger points in the  
37 gastrocnemius and tibialis anterior muscles<sup>16</sup> or the greater muscle fatigue in the tibialis  
38 anterior muscle<sup>35</sup> observed in FM. Future studies should investigate neurophysiological  
39 mechanisms related to changes in balance strategy in subjects with FM.  
40  
41  
42  
43  
44  
45  
46  
47  
48

49  
50 The most relevant result of our study was the positive association between balance  
51 scores and functional independence during ADL since the greater the loss of postural  
52 balance, the greater the interference with those ADL activities requiring proper postural  
53 control and balance, e.g., bathing and dressing. These findings are valuable for planning  
54  
55  
56  
57  
58  
59  
60

1  
2  
3 proper treatment interventions, since deficits or loss of independence in these ADLs has  
4 a negative impact on the quality of life of the patients. Our results agree with the study  
5 by Amris et al<sup>36</sup> who investigated women with widespread chronic pain symptoms and  
6 observed that patients with FM have substantial problems affecting their daily life and  
7 are liable to need community support. Therefore, current findings can help for planning  
8 multidisciplinary interventions for individuals with FM. For instance, balance strategies  
9 and postural control can be treated with physical therapy whereas therapeutic strategies  
10 for improvement of ADL efficacy should be applied by occupational therapists. Further,  
11 cognitive behaviors or fear to movement can be benefit from psychological approaches.  
12  
13

14  
15  
16  
17  
18  
19  
20  
21  
22  
23 Finally, this study presents several limitations. First, although significant differences  
24 were found between groups, these were based on a small sample size. Nevertheless, we  
25 believe that a large sample size would not alter the direction of our findings. Further, the  
26 population included was recruited from a regional hospital, which makes generalization  
27 of the results to the general population difficult. Consequently, further epidemiological  
28 studies with larger sample sizes are needed to enable a more generalized interpretation  
29 of the results. Second, we only included women diagnosed with FM. It is unknown  
30 whether men with FM would also exhibit similar results. Third, we excluded women  
31 with FM and comorbid depressive symptoms, so extrapolation of our results to this  
32 subgroup of patients with FM should be considered with caution. Although it seems that  
33 depression or anxiety may affect balance<sup>37</sup>; we do not know the effect of depression in  
34 the outcomes included in our study, particularly those related to the FIM. Fourth, as  
35 fatigue is a common denominator in individuals with FM, it was unknown whether the  
36 inclusion of several functional outcomes could be affected by rest-periods.  
37  
38  
39  
40  
41  
42  
43  
44  
45  
46  
47  
48  
49  
50  
51  
52  
53  
54  
55  
56  
57  
58  
59  
60

## CONCLUSIONS

Women with FM exhibit poor balance and use different strategies for maintaining upright posture as compared to healthy women which may be associated to disturbances of the vestibular system. Additionally, balance deficits are associated with a negative impact on functional independence in ADL. Multidisciplinary treatments directed at improving the problems faced during ADLs may help improve the autonomy of women with FM.

### Competing interests

All authors declare: no support from any organization for the submitted work; no financial relationships with any organizations that might have an interest in the submitted work in the previous three years, no other relationships or activities that could appear to have influenced the submitted work.

### Funding

This research received no specific grant from any funding agency in the public, commercial, or not-for-profit sectors.

### Data sharing statement

No additional data are available.



### Contributor-ship Information

- Concept development (provided idea for the research): Marta Pérez de Heredia Torres.
- Design (plane the methods to generate the results): Marta Pérez de Heredia Torres, Elisabet Huertas Hoyas, Rosa Martínez Piédrola, Domingo Palacios Ceña, Jorge Alegre Ayala, Montserrat Santamaría Vázquez, César Fernández de las Peñas.
- Supervision (provided oversight, responsible for organization and implementation, writing of the manuscript): Marta Pérez de Heredia Torres, Elisabet Huertas Hoyas and César Fernández de las Peñas.
- Datta Collection/processing (responsible for experiments, patient management, organization, or reporting data): Rosa Martínez Piédrola, Domingo Palacios Ceña, and Montserrat Santamaría Vázquez.
- Analysis/interpretation (responsible for statistical analysis, evaluation, and presentation of the results): Marta Pérez de Heredia Torres, Elisabet Huertas Hoyas, Domingo Palacios Ceña, Jorge Alegre Ayala, César Fernández de las Peñas.
- Literature search (performed the literature search): Marta Pérez de Heredia Torres, Elisabet Huertas Hoyas, Rosa Martínez Piédrola, Domingo Palacios Ceña, and Montserrat Santamaría Vázquez.
- Writing (responsible for writing a substantive part of the manuscript): Marta Pérez de Heredia Torres, Elisabet Huertas Hoyas, Rosa Martínez Piédrola, Domingo Palacios Ceña, Jorge Alegre Ayala, Montserrat Santamaría Vázquez, César Fernández de las Peñas.
- Critical review (revised manuscript for intellectual content, this does not relate to spelling and grammar checking): Marta Pérez de Heredia Torres, Elisabet Huertas Hoyas and César Fernández de las Peñas.

## REFERENCES

- [1] Branco JC, Bannwarth B, Failde I et al. Prevalence of fibromyalgia: a survey in five European countries. *Semin Arthritis Rheum* 2010; 39: 448-53. .
- [2] Villanueva VL, Valía JC, Cerdá G, MonsalveV, Bayona MJ, De Andrés J. [Fibromyalgia: diagnosis and treatment. Current knowledge]. *Rev Soc Española Dolor* 2004; 11:430-43.
- [3] Mitani Y, Fukunaga M, Kanbara K, Takebayashi N, Ishino S, Nakai Y. Evaluation of psychophysiological asymmetry in patients with fibromyalgia syndrome. *Appl Psychophysiol Biofeedback* 2006; 31: 217–25.
- [4] Westgaard RH. Muscle activity as a releasing factor for pain in the shoulder and neck. *Cephalalgia* 1999; 19: S1-S8.
- [5] Bennett RM, Jones J, Turk DC, Russell IJ, Matallana L. An internet survey of 2,596 people with fibromyalgia. *BMC Musculoskelet Disord* 2007; 8: 27
- [6] Katz R, Ferbert S, Leavitt F. Fibromyalgia patients report many symptoms other than pain and fatigue. *Arthritis Rheum* 2007; 56: 1532
- [7] Müller W, Kelemen J, Stratz T. Spinal factors in the generation of fibromyalgia syndrome. *Z Rheumatol* 1998;57: S36-S42.
- [8] Latorre-Román P., Santos-Campos M., Heredia-Jimenez J., Delgado-Fernández M., Soto-Hermoso V. Analysis of the performance of women with fibromyalgia in the six-minute walk test and its relation with health and quality of life. *J. Sports Med Phys Fit* 2014; 54: 511-7
- [9] Meireles SA, Antero DC, Kulczycki MM, Skare TL. Prevalence of falls in fibromyalgia patients. *Acta Orto Brasil* 2014; 22: 163-66.
- [10] Jones KD, Horak FB, Winters Stone K, Irvine JM, Bennett RM. Fibromyalgia is associated with impaired balance and falls. *J Clin Rheumatol* 2009; 15: 16-21.

1  
2  
3 [11] Akkaya N, Akkaya S, Atalay NS, Acar M, Catalbas N, Sahin F. Assessment of  
4 the relationship between postural stability and sleep quality in patients with  
5 fibromyalgia. *Clin Rheumatol* 2013; 32: 325-31  
6  
7

8  
9 [12] Simms RW, Roy SH, Hrovat M et al. Lack of association between fibromyalgia  
10 syndrome and abnormalities in muscle energy metabolism. *Arthritis Rheum* 1994;  
11 37: 794-800.  
12  
13

14 [13] Galeano D, Brunetti F, Torricelli D, Piazza S, Pons JL. A tool for balance  
15 control training using muscle synergies and multimodal interfaces. *BioMed Res*  
16 *Inter* 2014; 2014:565-70.  
17  
18

19 [14] Leitner C, Mair P, Paul B, Wick F, Mittermaier C, Sycha T, Ebenbichler G.  
20 Reliability of posturographic measurements in the assessment of impaired  
21 sensorimotor function in chronic low back pain. *J Electrom Kines* 2009; 19: 380-90.  
22  
23

24 [15] Barona R. Posturografía. En: Bartual J, Pérez N (eds). *El sistema vestibular y*  
25 *sus alteraciones*. Barcelona, Masson: 1988. Pp 150-5.  
26  
27

28 [16] Jones KD, King LA, Mist SD, Bennett RM, Horak FB. Postural control deficits  
29 in people with fibromyalgia: a pilot study. *Arthritis Res Ther* 2011; 13: R127.  
30  
31

32 [17] Muto L, Mango P, Sauer J, Yuan S, Sousa A, Marques A. Postural control and  
33 balance self efficacy in women with fibromyalgia. Are there differences? *Eur J*  
34 *Physl Rehabil Med* 2015; 51: 149-54.  
35  
36

37 [18] Russek LN, Fulk G. Pilot study assessing balance in women with fibromyalgia  
38 syndrome. *Physiother Theory Pract* 2009; 25: 555-65.  
39  
40

41 [19] Wolfe F, Smythe HA, Yunus M et al. The American College of Rheumatology.  
42 Criteria for the classification of fibromyalgia. Report of the multicenter criteria  
43 comitee. *Arthritis Rheum* 1990; 33: 160-72.  
44  
45  
46  
47  
48  
49  
50  
51  
52  
53  
54  
55  
56  
57  
58  
59  
60

1  
2  
3 [20] Wolfe F, Clauw DJ, Fitzcharles MA et al. The American College of  
4 Rheumatology preliminary diagnostic criteria for fibromyalgia and measurement of  
5 symptom severity. *Arthritis Care Res* 2010; 62: 600-10.  
6  
7

8  
9 [21] Segura-Jiménez V, Aparicio VA, Álvarez-Gallardo IC, Soriano-Maldonado A,  
10 Estévez-López F, Delgado-Fernández M et al. Validation of the modified 2010  
11 American College of Rheumatology diagnostic criteria for fibromyalgia in a  
12 Spanish population. *Rheumatology* 2014; 53: 1803-11.  
13  
14

15  
16 [22] Segura-Jiménez V, Soriano-Maldonado A, Álvarez-Gallardo IC, Estévez-López  
17 F, Carbonell-Baeza A, Delgado-Fernández M. Subgroups of fibromyalgia patients  
18 using the 1990 American College of Rheumatology criteria and the modified 2010  
19 preliminary diagnostic criteria: the al-Ándalus project. *Clin Exp Rheumatol* 2016;  
20 34: S26-33.  
21  
22

23  
24 [23] Esteve Vives JJ, Rivera J, Salvat Salvat I, Gracia Blanco M, Alegre de Miguel  
25 C. Proposal for a consensus version of the Fibromyalgia Impact Questionnaire (FIQ)  
26 for the Spanish population. *Reumatol Clin* 2007; 3: 21-24.  
27  
28

29  
30 [24] Burckhardt CS, Clark SR, Bennett R. The Fibromyalgia Impact Questionnaire:  
31 development and validation. *J Rheumatol* 1991;18: 728-33.  
32  
33

34  
35 [25] Guide for the Uniform Data Set for Medical Rehabilitation (Adult FIM).  
36 Version 4.0., Buffalo (Nueva York): State University of New York at Buffalo; 1993.  
37  
38

39  
40 [26] Dodds TA, Martin DP, Stolov WC, Deyo RA. A validation of the functional  
41 independence measurement and its performance among rehabilitation inpatients.  
42  
43 *Arch Phys Med Rehabil* 1993; 74: 531-536  
44

45  
46 [27] Heinemann AW, Linacre JM, Wright BD, Hamilton B, Granger C. Prediction  
47 of rehabilitation outcomes with disability measures. *Arch Phys Med Rehabil* 1994;  
48 75: 133-143  
49  
50  
51

- 1  
2  
3 [28] Hobart JC, Lamping DL, Freeman JA et al. Evidence-based measurement:  
4 which disability scale for neurologic rehabilitation? *Neurology* 2001; 57: 639-644  
5  
6  
7 [29] Nashner LM. Computerized dynamic posturography. In: Jacobson GP,  
8 Newman CW, Kartush JM (editors). *Handbook of balance function and testing*. St.  
9 Louis: Mosby Year Book; 1993. Pp. 280-307  
10  
11  
12 [30] NeuroCom International. Neurocom system operator's manual. Clackamas,  
13 OR: NeuroCom International; 2000  
14  
15  
16 [31] Wrisley DM, Stephens MJ, Mosley S, Wojnowski A, Duffy J, Burkard R.  
17 Learning effects of repetitive administrations of the sensory organization test in  
18 healthy young adults. *Arch Phys Med Rehabil* 2007; 88: 1049-1054  
19  
20  
21 [32] Holm S. A simple sequentially rejective multiple test procedure. *Scand J Stat*  
22 1979; 6: 65-70  
23  
24  
25 [33] de Bruijn ST, van Wjich AJ, Geenen R et al. Relevance of physical fitness  
26 levels and exercise-related beliefs for self-reported and experimental pain in  
27 fibromyalgia: an explorative study. *Clin Rheumatol* 2011; 17: 295-301.  
28  
29  
30 [34] Bayazit YA, Gursoy S, Ozer E et al. Neurotologic manifestations of the  
31 fibromyalgia syndrome *J Neurol Sci* 2002; 196: 77-80  
32  
33  
34 [35] Bazzichi L, Dini M, Rossi A et al. Muscle modifications in fibromyalgic  
35 patients revealed by surface electromyography (SEMG) analysis. *BMC*  
36 *Musculoskelet Disord* 2009; 10: 36  
37  
38  
39 [36] Amris K, Wæhrens EE, Jespersen A, Bliddal H, Danneskiold-Samøe B.  
40 Observation-based assessment of functional ability in patients with chronic  
41 widespread pain: a cross-sectional study. *Pain* 2011; 152: 2470-76.  
42  
43  
44  
45  
46  
47  
48  
49  
50  
51  
52  
53  
54  
55  
56  
57  
58  
59  
60

1  
2  
3  
4  
5  
6  
7  
8  
9  
10  
11  
12  
13  
14  
15  
16  
17  
18  
19  
20  
21  
22  
23  
24  
25  
26  
27  
28  
29  
30  
31  
32  
33  
34  
35  
36  
37  
38  
39  
40  
41  
42  
43  
44  
45  
46  
47  
48  
49  
50  
51  
52  
53  
54  
55  
56  
57  
58  
59  
60

[37] Hassett AL, Simonelli LE, Radvanski DC, Buyske S, Savage SV, Sigal L. The relationship between affect balance style and clinical outcomes in fibromyalgia. *Arthritis Rheum* 2008; 59: 833-40.

For peer review only

**TITLES OF TABLES**

**Table 1:** Differences in the values of the sensory organization test (SOT) between women with FM and healthy women

**Table 2:** Correlations between clinical pain variables and the SOT balance values in women with FM

**Table 3:** Correlations between the clinical pain variables and the SOT strategy values in women with FM

**Table 4:** Correlations between the SOT balance and strategy values and the FIM in women with FM

**Table 1:** Differences in the values of the sensory organization test (SOT) between women with FM and healthy women

|                      | Condition 1#    | Condition 2# | Condition 3# | Condition 4#* | Condition 5#* | Condition 6#* |
|----------------------|-----------------|--------------|--------------|---------------|---------------|---------------|
|                      | <b>Balance</b>  |              |              |               |               |               |
| <b>Women with FM</b> | 93.1 ± 5.4      | 89.7 ± 4.9   | 86.3 ± 7.0   | 76.5 ± 13.4   | 52.1 ± 18.0   | 54.7 ± 19.4   |
| <b>Healthy women</b> | 95.7 ± 1.3      | 92.3 ± 3.4   | 90.7 ± 5.3   | 86.4 ± 9.3    | 68.4 ± 12.6   | 70.8 ± 11.9   |
|                      | <b>Strategy</b> |              |              |               |               |               |
| <b>Women with FM</b> | 98.5 ± 1.6      | 97.3 ± 4.4   | 96.7 ± 3.4   | 85.7 ± 8.1    | 76.1 ± 12.0   | 78.1 ± 7.6    |
| <b>Healthy women</b> | 98.8 ± 0.6      | 98.7 ± 0.7   | 98.3 ± 1.3   | 91.9 ± 3.2    | 81.2 ± 12.7   | 83.1 ± 11.1   |

Data are expressed as means ± Standard Deviation

# Statistically significant differences between patients and controls (P<0.01; ANOVA test)

\* Statistically significant differences between conditions 1-3 (P<0.001; ANOVA test)

Footnote: 1) eyes open, fixed visual surround and fixed support platform; 2) eyes closed, fixed support platform; 3) eyes open, mobile visual surround (moving proportional to the angle of anterior-posterior body sway) and the fixed support platform; 4) eyes open, fixed visual surround and mobile support platform (moving proportional to the angle of anterior-posterior body sway); 5) eyes closed, mobile support platform; and 6) eyes open, mobile visual surround and mobile support platform.



**Table 2:** Correlations between clinical pain variables and the SOT balance values in women with FM

|                    | Duration of symptoms     | Current pain             | Best pain                | Worse pain               |
|--------------------|--------------------------|--------------------------|--------------------------|--------------------------|
| <b>Condition 1</b> | $r_s = 0.124; P = 0.602$ | $r_s = 0.276; P = 0.239$ | $r_s = 0.242; P = 0.304$ | $r_s = 0.169; P = 0.476$ |
| <b>Condition 2</b> | $r_s = 0.291; P = 0.213$ | $r_s = 0.051; P = 0.830$ | $r_s = 0.334; P = 0.149$ | $r_s = 0.179; P = 0.450$ |
| <b>Condition 3</b> | $r_s = 0.310; P = 0.183$ | $r_s = 0.152; P = 0.552$ | $r_s = 0.131; P = 0.581$ | $r_s = 0.127; P = 0.593$ |
| <b>Condition 4</b> | $r_s = 0.308; P = 0.186$ | $r_s = 0.084; P = 0.736$ | $r_s = 0.076; P = 0.749$ | $r_s = 0.07; P = 0.769$  |
| <b>Condition 5</b> | $r_s = 0.135; P = 0.571$ | $r_s = 0.111; P = 0.642$ | $r_s = 0.151; P = 0.526$ | $r_s = 0.219; P = 0.354$ |
| <b>Condition 6</b> | $r_s = 0.123; P = 0.606$ | $r_s = 0.050; P = 0.835$ | $r_s = 0.156; P = 0.511$ | $r_s = 0.156; P = 0.512$ |

$r_s$  = Spearman's correlation test (Spearman's rho)

**Table 3:** Correlations between the clinical pain variables and the SOT strategy values in women with FM

|                    | Duration of symptoms       | Current pain               | Best pain                  | Worse pain                 |
|--------------------|----------------------------|----------------------------|----------------------------|----------------------------|
| <b>Condition 1</b> | $r_s = -0.088$ ; P = 0.713 | $r_s = 0.076$ ; P = 0.749  | $r_s = 0.204$ ; P = 0.388  | $r_s = 0.047$ ; P = 0.846  |
| <b>Condition 2</b> | $r_s = 0.124$ ; P = 0.602  | $r_s = -0.032$ ; P = 0.894 | $r_s = -0.399$ ; P = 0.082 | $r_s = -0.210$ ; P = 0.613 |
| <b>Condition 3</b> | $r_s = 0.123$ ; P = 0.604  | $r_s = -0.073$ ; P = 0.759 | $r_s = -0.040$ ; P = 0.867 | $r_s = -0.022$ ; P = 0.926 |
| <b>Condition 4</b> | $r_s = -0.069$ ; P = 0.772 | $r_s = -0.161$ ; P = 0.498 | $r_s = -0.118$ ; P = 0.621 | $r_s = -0.130$ ; P = 0.585 |
| <b>Condition 5</b> | $r_s = 0.036$ ; P = 0.879  | $r_s = 0.046$ ; P = 0.848  | $r_s = -0.140$ ; P = 0.555 | $r_s = 0.380$ ; P = 0.098  |
| <b>Condition 6</b> | $r_s = -0.097$ ; P = 0.685 | $r_s = -0.086$ ; P = 0.718 | $r_s = -0.010$ ; P = 0.966 | $r_s = -0.151$ ; P = 0.525 |

$r_s$  = Spearman's correlation test (Spearman's rho)

**Table 4:** Correlations between the SOT balance and strategy values and the FIM in women with FM

|                     | Balance |         |         |        |        |         | Strategy |        |        |         |        |         |
|---------------------|---------|---------|---------|--------|--------|---------|----------|--------|--------|---------|--------|---------|
|                     | 1       | 2       | 3       | 4      | 5      | 6       | 1        | 2      | 3      | 4       | 5      | 6       |
| Eating              | .280    | .179    | .246    | .251   | .246   | .350*   | .175     | .258   | .185   | .222    | .154   | .222    |
| Grooming            | .316*   | .288    | .308*   | .375** | .428** | .451**  | .002     | .108   | .154   | .423**  | .252   | .423**  |
| Bathing/showering   | .314*   | .469**  | .481**  | .429** | .491** | .541*** | .256     | .434** | .436** | .427**  | .402*  | .427**  |
| Dressing upper body | .311*   | .323*   | .301    | .458** | .343*  | .307*   | .136     | .232   | .313*  | .530**  | .450** | .530*** |
| Dressing lower body | .401**  | .448**  | .336*   | .373** | .351*  | .438**  | .100     | .237   | .336*  | .562*** | .469** | .562*** |
| Toileting           | .251    | .376**  | .258    | .259   | .251   | .483**  | .055     | .223   | .273   | .521**  | .430** | .521*** |
| Bowel management    | -.165   | -.020   | -.131   | .062   | .187   | -.165*  | -.212    | -.076  | -.221  | .141    | .030   | .141    |
| Bladder management  | .064    | -.051   | -.002   | .204   | .083   | .064    | .087     | .061   | .099   | .086    | .303   | .086    |
| Chair-bed transfers | .325*   | .491*** | .510*** | .433** | .451** | .441**  | .220     | .456** | .378** | .389**  | .422** | .389**  |
| Toilet transfers    | .195    | .223    | .282    | .453** | .255   | .197    | .145     | .318*  | .377** | .452**  | .418** | .452**  |
| Bath transfers      | .417*   | .441    | .354    | .321   | .257   | .405    | .257     | .314*  | .351** | .558*** | .407** | .558*** |
| Locomotion          | .110    | -.172   | -.039   | -.009  | -.158  | -.192   | .105     | .132   | .141   | -.133   | .000   | -.133   |
| Stairs              | .365*   | .238    | .079    | .164   | .212   | .164    | .159     | .154   | .050   | .176    | .173   | .176    |
| Comprehension       | .205    | .264    | .311*   | .407** | .270   | .281    | .180     | .375** | .254   | .364**  | .250   | .364**  |
| Expression          | .097    | .095    | .113    | .477** | .247   | .372*   | -.187    | -.108  | -.144  | .306*   | -.061  | .306*   |
| Social interaction  | .285    | .220    | .303    | .212   | .005   | .088    | .239     | .398** | .424** | .269    | .158   | .269    |
| Problem solving     | .192    | .220    | .245    | .307*  | .364*  | .261    | -.018    | .033   | -.006  | .197    | -.008  | .197    |
| Memory              | .311*   | .340*   | .384**  | .468** | .396** | .449**  | .069     | .156   | .314*  | .393**  | .267   | .393**  |

\* P<0.05; \*\* P<0.01; \*\*\* P<0.001

Footnote: 1) eyes open, fixed visual surround and fixed support platform; 2) eyes closed, fixed support platform; 3) eyes open, mobile visual surround (moving proportional to the angle of anterior-posterior body sway) and the fixed support platform; 4) eyes open, fixed visual surround and mobile support platform (moving proportional to the angle of anterior-posterior body sway); 5) eyes closed, mobile support platform; and 6) eyes open, mobile visual surround and mobile support platform.

## STROBE Statement—checklist of items that should be included in reports of observational studies

## Balance deficiencies in women with fibromyalgia assessed using computerized dynamic posturography

|                              | Item No | Recommendation                                                                                                                                                                                                                                                                                                                                                                                                                                                         | Page |
|------------------------------|---------|------------------------------------------------------------------------------------------------------------------------------------------------------------------------------------------------------------------------------------------------------------------------------------------------------------------------------------------------------------------------------------------------------------------------------------------------------------------------|------|
| <b>Title and abstract</b>    | 1       | (a) Indicate the study's design with a commonly used term in the title or the abstract                                                                                                                                                                                                                                                                                                                                                                                 | 2    |
|                              |         | (b) Provide in the abstract an informative and balanced summary of what was done and what was found                                                                                                                                                                                                                                                                                                                                                                    | 2    |
| <b>Introduction</b>          |         |                                                                                                                                                                                                                                                                                                                                                                                                                                                                        |      |
| Background/rationale         | 2       | Explain the scientific background and rationale for the investigation being reported                                                                                                                                                                                                                                                                                                                                                                                   | 3-4  |
| Objectives                   | 3       | State specific objectives, including any prespecified hypotheses                                                                                                                                                                                                                                                                                                                                                                                                       | 4    |
| <b>Methods</b>               |         |                                                                                                                                                                                                                                                                                                                                                                                                                                                                        |      |
| Study design                 | 4       | Present key elements of study design early in the paper                                                                                                                                                                                                                                                                                                                                                                                                                | 4    |
| Setting                      | 5       | Describe the setting, locations, and relevant dates, including periods of recruitment, exposure, follow-up, and data collection                                                                                                                                                                                                                                                                                                                                        | 4    |
| Participants                 | 6       | (a) <i>Cohort study</i> —Give the eligibility criteria, and the sources and methods of selection of participants. Describe methods of follow-up<br><i>Case-control study</i> —Give the eligibility criteria, and the sources and methods of case ascertainment and control selection. Give the rationale for the choice of cases and controls<br><i>Cross-sectional study</i> —Give the eligibility criteria, and the sources and methods of selection of participants | 4-5  |
|                              |         | (b) <i>Cohort study</i> —For matched studies, give matching criteria and number of exposed and unexposed<br><i>Case-control study</i> —For matched studies, give matching criteria and the number of controls per case                                                                                                                                                                                                                                                 |      |
| Variables                    | 7       | Clearly define all outcomes, exposures, predictors, potential confounders, and effect modifiers. Give diagnostic criteria, if applicable                                                                                                                                                                                                                                                                                                                               | 7-8  |
| Data sources/<br>measurement | 8*      | For each variable of interest, give sources of data and details of methods of assessment (measurement). Describe comparability of assessment methods if there is more than one group                                                                                                                                                                                                                                                                                   |      |
| Bias                         | 9       | Describe any efforts to address potential sources of bias                                                                                                                                                                                                                                                                                                                                                                                                              |      |
| Study size                   | 10      | Explain how the study size was arrived at                                                                                                                                                                                                                                                                                                                                                                                                                              | 8-9  |
| Quantitative variables       | 11      | Explain how quantitative variables were handled in the analyses. If applicable, describe which groupings were chosen and why                                                                                                                                                                                                                                                                                                                                           | 8    |
| Statistical methods          | 12      | (a) Describe all statistical methods, including those used to control for confounding                                                                                                                                                                                                                                                                                                                                                                                  | 8    |
|                              |         | (b) Describe any methods used to examine subgroups and interactions                                                                                                                                                                                                                                                                                                                                                                                                    | 8    |
|                              |         | (c) Explain how missing data were addressed                                                                                                                                                                                                                                                                                                                                                                                                                            |      |
|                              |         | (d) <i>Cohort study</i> —If applicable, explain how loss to follow-up was addressed<br><i>Case-control study</i> —If applicable, explain how matching of cases and controls was addressed<br><i>Cross-sectional study</i> —If applicable, describe analytical methods taking account of sampling strategy                                                                                                                                                              |      |
|                              |         | (e) Describe any sensitivity analyses                                                                                                                                                                                                                                                                                                                                                                                                                                  |      |

| <b>Results</b>           |     |                                                                                                                                                                                                              |       |
|--------------------------|-----|--------------------------------------------------------------------------------------------------------------------------------------------------------------------------------------------------------------|-------|
| Participants             | 13* | (a) Report numbers of individuals at each stage of study—eg numbers potentially eligible, examined for eligibility, confirmed eligible, included in the study, completing follow-up, and analysed            | 8-9   |
|                          |     | (b) Give reasons for non-participation at each stage                                                                                                                                                         | 9     |
|                          |     | (c) Consider use of a flow diagram                                                                                                                                                                           |       |
| Descriptive data         | 14* | (a) Give characteristics of study participants (eg demographic, clinical, social) and information on exposures and potential confounders                                                                     | 8-9   |
|                          |     | (b) Indicate number of participants with missing data for each variable of interest                                                                                                                          | 9     |
|                          |     | (c) <i>Cohort study</i> —Summarise follow-up time (eg, average and total amount)                                                                                                                             |       |
| Outcome data             | 15* | <i>Cohort study</i> —Report numbers of outcome events or summary measures over time                                                                                                                          |       |
|                          |     | <i>Case-control study</i> —Report numbers in each exposure category, or summary measures of exposure                                                                                                         |       |
|                          |     | <i>Cross-sectional study</i> —Report numbers of outcome events or summary measures                                                                                                                           | 9-10  |
| Main results             | 16  | (a) Give unadjusted estimates and, if applicable, confounder-adjusted estimates and their precision (eg, 95% confidence interval). Make clear which confounders were adjusted for and why they were included | 8     |
|                          |     | (b) Report category boundaries when continuous variables were categorized                                                                                                                                    |       |
|                          |     | (c) If relevant, consider translating estimates of relative risk into absolute risk for a meaningful time period                                                                                             |       |
| Other analyses           | 17  | Report other analyses done—eg analyses of subgroups and interactions, and sensitivity analyses                                                                                                               |       |
| <b>Discussion</b>        |     |                                                                                                                                                                                                              |       |
| Key results              | 18  | Summarise key results with reference to study objectives                                                                                                                                                     | 10-11 |
| Limitations              | 19  | Discuss limitations of the study, taking into account sources of potential bias or imprecision. Discuss both direction and magnitude of any potential bias                                                   | 12    |
| Interpretation           | 20  | Give a cautious overall interpretation of results considering objectives, limitations, multiplicity of analyses, results from similar studies, and other relevant evidence                                   | 12-13 |
| Generalisability         | 21  | Discuss the generalisability (external validity) of the study results                                                                                                                                        | 12    |
| <b>Other information</b> |     |                                                                                                                                                                                                              |       |
| Funding                  | 22  | Give the source of funding and the role of the funders for the present study and, if applicable, for the original study on which the present article is based                                                | 1     |

\*Give information separately for cases and controls in case-control studies and, if applicable, for exposed and unexposed groups in cohort and cross-sectional studies.

**Note:** An Explanation and Elaboration article discusses each checklist item and gives methodological background and published examples of transparent reporting. The STROBE checklist is best used in conjunction with this article (freely available on the Web sites of PLoS Medicine at <http://www.plosmedicine.org/>, Annals of Internal Medicine at <http://www.annals.org/>, and Epidemiology at <http://www.epidem.com/>). Information on the STROBE Initiative is available at [www.strobe-statement.org](http://www.strobe-statement.org).

# BMJ Open

## Balance deficiencies in women with fibromyalgia assessed using computerized dynamic posturography: a cross-sectional study in Spain

|                                 |                                                                                                                                                                                                                                                                                                                                                                                                                                                                                                                                                                                                                                                                                                                                                                                                                                                                                                                                                                                                                                                                                                 |
|---------------------------------|-------------------------------------------------------------------------------------------------------------------------------------------------------------------------------------------------------------------------------------------------------------------------------------------------------------------------------------------------------------------------------------------------------------------------------------------------------------------------------------------------------------------------------------------------------------------------------------------------------------------------------------------------------------------------------------------------------------------------------------------------------------------------------------------------------------------------------------------------------------------------------------------------------------------------------------------------------------------------------------------------------------------------------------------------------------------------------------------------|
| Journal:                        | <i>BMJ Open</i>                                                                                                                                                                                                                                                                                                                                                                                                                                                                                                                                                                                                                                                                                                                                                                                                                                                                                                                                                                                                                                                                                 |
| Manuscript ID                   | bmjopen-2017-016239.R2                                                                                                                                                                                                                                                                                                                                                                                                                                                                                                                                                                                                                                                                                                                                                                                                                                                                                                                                                                                                                                                                          |
| Article Type:                   | Research                                                                                                                                                                                                                                                                                                                                                                                                                                                                                                                                                                                                                                                                                                                                                                                                                                                                                                                                                                                                                                                                                        |
| Date Submitted by the Author:   | 26-May-2017                                                                                                                                                                                                                                                                                                                                                                                                                                                                                                                                                                                                                                                                                                                                                                                                                                                                                                                                                                                                                                                                                     |
| Complete List of Authors:       | <p>Perez-de-Heredia, Marta; Universidad Rey Juan Carlos, Physiotherapy, Occupational Therapy, Rehabilitation and Physical Medicine.<br/>           Huertas-Hoyas, Elisabet; Universidad Rey Juan Carlos Facultad de Ciencias de la Salud, Physical Therapy, Occupational Therapy, Rehabilitation and Physical Medicine<br/>           Martínez-Piedrola, Rosa; Universidad Rey Juan Carlos, Physiotherapy, Occupational Therapy, Rehabilitation and Physical Medicine.<br/>           Palacios-Cena, Domingo; Univ Rey Juan Carlos, Physical Therapy, Occupational Therapy, Rehabilitation and Physical Medicine; Universidad Rey Juan Carlos,<br/>           Alegre-Ayala, Jorge; Universidad Rey Juan Carlos Facultad de Ciencias de la Salud, Physical Therapy, Occupational Therapy, Rehabilitation and Physical Medicine<br/>           Santamaría Vázquez, Montserrat; Universidad de Burgos<br/>           Fernández de las Peñas, Cesar; Universidad Rey Juan Carlos Facultad de Ciencias de la Salud, Physical Therapy, Occupational Therapy, Rehabilitation and Physical Medicine</p> |
| <b>Primary Subject Heading</b>: | Rheumatology                                                                                                                                                                                                                                                                                                                                                                                                                                                                                                                                                                                                                                                                                                                                                                                                                                                                                                                                                                                                                                                                                    |
| Secondary Subject Heading:      | Occupational and environmental medicine, Rehabilitation medicine                                                                                                                                                                                                                                                                                                                                                                                                                                                                                                                                                                                                                                                                                                                                                                                                                                                                                                                                                                                                                                |
| Keywords:                       | Postural Balance, Fibromyalgia, Patient Positioning                                                                                                                                                                                                                                                                                                                                                                                                                                                                                                                                                                                                                                                                                                                                                                                                                                                                                                                                                                                                                                             |
|                                 |                                                                                                                                                                                                                                                                                                                                                                                                                                                                                                                                                                                                                                                                                                                                                                                                                                                                                                                                                                                                                                                                                                 |

SCHOLARONE™  
Manuscripts

1  
2  
3  
4  
5  
6  
7  
8  
9  
10  
11  
12  
13  
14  
15  
16  
17  
18  
19  
20  
21  
22  
23  
24  
25  
26  
27  
28  
29  
30  
31  
32  
33  
34  
35  
36  
37  
38  
39  
40  
41  
42  
43  
44  
45  
46  
47  
48  
49  
50  
51  
52  
53  
54  
55  
56  
57  
58  
59  
60

## Balance deficiencies in women with fibromyalgia assessed using computerized dynamic posturography: a cross-sectional study in Spain

- Marta Pérez-de-Heredia-Torres<sup>1</sup>, PhD, Occupational therapist. Avenida de Atenas s/n. CP.28922, Alcorcón, Madrid. Tel. +34914888886. Fax: +34914888957.  
[marta.perezdeheredia@urjc.es](mailto:marta.perezdeheredia@urjc.es)
- Elisabet Huertas-Hoyas<sup>1</sup>, PhD, Occupational therapist. Avenida de Atenas s/n. CP.28922, Alcorcón, Madrid. Tel. +34914889023. Fax: +3491488 89 57. [elisabet.huertas@urjc.es](mailto:elisabet.huertas@urjc.es)
- M<sup>a</sup> Rosa Martínez-Piédrola<sup>1</sup>, PhD, Occupational therapist. Avenida de Atenas s/n. CP.28922, Alcorcón, Madrid. Tel. +34914888887. Fax: +3491488 89 57. [rosa.martinez@urjc.es](mailto:rosa.martinez@urjc.es)
- Domingo Palacios-Ceña<sup>1</sup>, PhD, Nurse. Avenida de Atenas s/n. CP.28922, Alcorcón, Madrid. Tel. +34914888883. Fax: +3491488 89 57. [domingo.palacios@urjc.es](mailto:domingo.palacios@urjc.es)
- Jorge Alegre-Ayala<sup>1</sup>, PhD, Occupational therapist. Avenida de Atenas s/n. CP.28922, Alcorcón, Madrid. Tel. +34914889023. Fax: +3491488 89 57. [jorge.alegre@urjc.es](mailto:jorge.alegre@urjc.es)
- Montserrat Santamaría-Vázquez<sup>2</sup>, PhD, Occupational therapist. Paseo Comendadores s/n. CP.09001. [msvazquez@ubu.es](mailto:msvazquez@ubu.es)
- César Fernández-de-las-Peñas<sup>1</sup>, PhD, Physical therapist. Avenida de Atenas s/n. CP.28922, Alcorcón, Madrid. Spain. Tel. +34 914888884. Fax: +34914888957.  
[cesar.fernandez@urjc.es](mailto:cesar.fernandez@urjc.es)

<sup>1</sup> Department of Physical Therapy, Occupational Therapy, Physical Medicine and Rehabilitation, Universidad Rey Juan Carlos, Alcorcón, Spain.

<sup>2</sup> Health Sciences Department. Burgos University, Burgos, Spain.

### Corresponding author:

Elisabet Huertas Hoyas,

Rey Juan Carlos University. Health Sciences Faculty.

Email: [elisabet.huertas@urjc.es](mailto:elisabet.huertas@urjc.es)

**ABSTRACT**

**Objectives:** Our aims were: 1) to compare the sensory organization of balance control and balance strategies between women with fibromyalgia (FM) and healthy women; 2) to investigate which sensory component, i.e., vestibular, visual or somato-sensory, is the most affected in FM; and, 3), to determine the associations between the functional independence measure (FIM) and balance responses in FM. **Design:** Cross-sectional observational study. **Setting:** Urban regional hospital and university (Universidad Rey Juan Carlos, Madrid, Spain). **Participants:** Twenty women with FM and 20 matched healthy women. **Primary/secondary outcome measures:** The Sensory Organization Test (SOT) was used to determine postural sway and balance during six different conditions with subjects in a standing position. The Functional Independence Measure (FIM) was used to determine the level of functional independence in daily life activities. Between-group differences were analyzed with ANCOVA and the Spearman's test was used for correlations. **Results:** Significant between-groups and between-conditions differences were found for all SOT conditions (all,  $P < 0.001$ ): women with FM showed lower scores being the vestibular score the most affected. Different correlations between SOT conditions and some specific daily life activities were observed in the FM group: bathing activity and balance condition 6 ( $r_s = 0.541$ ;  $P < 0.001$ ), bed transfers activity and conditions 2 ( $r_s = 0.491$ ;  $P < 0.001$ ) and 3 ( $r_s = 0.510$ ;  $P < 0.001$ ), positioning strategy 6 and dressing the upper ( $r_s = 0.530$ ;  $P < 0.001$ ) or lower ( $r_s = 0.562$ ;  $P < 0.001$ ) body, and toileting ( $r_s = 0.521$ ;  $P < 0.001$ ): the greater the loss of balance, the greater the interference on some daily life activities. **Conclusions:** Women with FM exhibited balance deficiencies and used different strategies for maintaining their balance in standing which was associated with a negative impact on functional independence.

**KEY WORDS:** Postural Balance, Fibromyalgia, Patient Positioning.



1  
2  
3  
4  
5  
6  
7  
8  
9  
10  
11  
12  
13  
14  
15  
16  
17  
18  
19  
20  
21  
22  
23  
24  
25  
26  
27  
28  
29  
30  
31  
32  
33  
34  
35  
36  
37  
38  
39  
40  
41  
42  
43  
44  
45  
46  
47  
48  
49  
50  
51  
52  
53  
54  
55  
56  
57  
58  
59  
60

For peer review only

1  
2  
3  
4  
5  
6  
7 **Strengths and limitations of this study:**  
8

- 9
- 10 • This is the first study investigating the association between postural balance and  
11 functional interference with activity daily living.  
12
  - 13 • The sample size was relatively small and from the same regional hospital.  
14
  - 15 • We only included women, but not men, diagnosed with fibromyalgia.  
16  
17  
18  
19  
20  
21  
22  
23  
24  
25  
26  
27  
28  
29  
30  
31  
32  
33  
34  
35  
36  
37  
38  
39  
40  
41  
42  
43  
44  
45  
46  
47  
48  
49  
50  
51  
52  
53  
54  
55  
56  
57  
58  
59  
60

## INTRODUCTION

Fibromyalgia (FM) is a chronic syndrome that has a considerable functional impact on patients. It is estimated that between 10-15% of the general population is affected by this syndrome in Europe<sup>1</sup>. The main complaint is generalized long-lasting muscle pain which is typically described as deep and intense and worsening with intense physical exercise, cold and/or emotional mental stress. This widespread pain is accompanied by other symptoms including asthenia, fatigue and non-restorative sleep together with other poorly defined symptoms<sup>2</sup>. Individuals with FM can also present muscle asymmetry<sup>3</sup> and difficulty for relaxing the muscles<sup>4</sup> which can contribute to fatigue and pain, leading to posture and balance deficit. In fact, balance problems are among the most debilitating symptoms reported by patients with FM.<sup>5,6</sup> Additionally, postural disturbances affecting the vertebral column have been also found<sup>7</sup> as well as lower spatio-temporal parameters during gait<sup>8</sup> and a higher risk of falls<sup>9-11</sup>. Finally, FM can be associated with general inactivity<sup>12</sup> which can lead to negative effects on the functional capacity of the patient.

Postural control requires the appropriate integration of sensory, visual, vestibular and somatosensory information into the central nervous system (mainly integrated by proprioceptive and cutaneous sensitivity). Posturography is a technique that enables a quantitative assessment of postural control by studying the displacements of the center of pressure in different circumstances simulating actions from normal daily life<sup>13</sup>. This technique itself does not enable a diagnosis; however, it provides information regarding functional status and is can be of value for guiding treatment.

Some of the most utilized tests in posturography include the Sensory Organization Test (SOT), the motor control test and the adaptation test<sup>14</sup>. The SOT enables isolation of components from the vestibular, visual and somatosensory systems that participate in the maintenance of postural control, enabling users to determine the site of the main

1  
2  
3 disorder causing the loss of balance<sup>15</sup>. Some previous studies have reported the presence  
4 of balance and postural control deficits in women with FM using different procedures<sup>16-</sup>  
5  
6  
7<sup>18</sup>. Muto et al<sup>17</sup> observed that patients with FM exhibited impaired postural control, e.g.,  
8  
9 increased speed of oscillation of the center of gravity and lower balance self-efficacy as  
10 assessed with the modified clinical test of sensory interaction on balance (mCTSIB) and  
11 the balance self-efficacy (ABC scale). In this study, impaired postural control and low  
12 balance self-efficacy were associated with pain severity and muscle strength<sup>17</sup>. Jones et  
13 al<sup>16</sup> found that FM patients showed lower scores in almost all conditions of the SOT and  
14 an increased number of falls. In this study, postural stability was associated to related  
15 disability, cognitive impairment and body mass index, but not to medication intake, pain  
16 severity or muscle strength<sup>16</sup>. In a pilot study using the SOT, Russek and Fulk<sup>18</sup> reported  
17 that 34% of FM subjects scored below the fifth percentile for population normative data  
18 in some SOT conditions. These authors also found a negative association between the  
19 somato-sensory score of the SOT and FM-related disability<sup>18</sup>. Although these studies  
20 support the occurrence of balance problems in patients with FM using the SOT, they did  
21 not investigate the association of balance disturbances with functional independence in  
22 activities of daily living (ADLs). The identification of an association between balance  
23 problems and ADL disturbances can help clinicians for developing specific therapeutic  
24 strategies for patients with FMS. To the best of the author's knowledge, no study has  
25 previously investigated this association in patients with FM.  
26  
27  
28  
29  
30  
31  
32  
33  
34  
35  
36  
37  
38  
39  
40  
41  
42  
43  
44  
45  
46

47 Therefore, the aims of the current study were: 1) to compare sensory organization of  
48 balance control and balance strategies between women with FM and healthy controls; 2)  
49 to investigate which sensory component (vestibular, visual or somato-sensory) is the  
50 most affected in FM women; and, 3), to determine the potential association between the  
51 functional independence measure (FIM) and balance responses in women with FM.  
52  
53  
54  
55  
56  
57  
58  
59  
60

## METHODS

### Research Design

A cross-sectional study was performed. We conducted non-probabilistic sampling of consecutive cases, where subjects who met the established criteria were included. The study was conducted during the second semester of 2015.

### Participants

Advertisements were placed in local newspapers in order to recruit healthy women from the general population for acting as control group. Participants were considered as healthy controls if they reported: no spontaneous pain symptoms at the moment of the study, no history of chronic pain (lasting more than 3 months), no pain experienced during the previous year prior to the study, no pain-related diagnoses and participants who were not taking antidepressant or analgesic medication.

Women with diagnosis of FM were recruited from the Department of Rheumatology at the Hospital Fundación Alcorcón (Spain). An experienced rheumatologist confirmed the FM diagnosis based on a combination of both American College of Rheumatology criteria (1990/m2010)<sup>19,20</sup>. It has been suggested that a combination of 1990 and m2010 criteria is recommended since it had the best diagnostic features<sup>21,22</sup>. Tender points were tested by digital palpation at the 18 sites according to the ACR protocol<sup>19</sup>. Participants were asked to indicate whether they experienced pain in response to a pressure of approximately 4 kg exerted by the examiner<sup>19</sup>. Further, the presence of fatigue, altered sleep patterns and other sensory symptoms self-perceived by the patient was recorded<sup>20</sup>. Face-to-face structured medical interviews were performed to determine the time of the diagnosis, socio-demographic and clinical data, current medication intake and presence of psychiatric disorders.

1  
2  
3 Exclusion criteria for both groups included: 1) co-morbid medical diagnoses, e.g.,  
4 cardiopulmonary disorders, inflammatory disease, obesity, and other diagnoses; 2)  
5 malignancy; 3) psychiatric illnesses diagnosis, e.g. schizophrenia or substance abuse; 4)  
6 depression (Beck Depression Inventory-II >8 points); 5) previous history of surgery; 6)  
7 previous history of whiplash; 7) uncontrolled endocrine disorders (i.e. hyper- or hypo-  
8 thyroidism, diabetes); or 8) pregnancy.

9  
10  
11  
12  
13  
14  
15  
16  
17  
18  
19  
20  
21  
22  
23  
24  
25  
26  
27  
28  
29  
30  
31  
32  
33  
34  
35  
36  
37  
38  
39  
40  
41  
42  
43  
44  
45  
46  
47  
48  
49  
50  
51  
52  
53  
54  
55  
56  
57  
58  
59  
60  
Participants were matched on the basis of their age and hand dominance to gain  
homogeneity in the sample during the performance of those ADLs involving the upper  
extremity. Hand dominance was determined by self-reports regarding the hand used for  
writing.

### **Ethical considerations**

The current study was conducted in accordance with the ethical standards of the  
Declaration of Helsinki and was reviewed and approved by the Ethics committee of the  
Hospital Fundación Alcorcón (protocol FHA-URJC 032). All subjects provided written  
informed consent.

### **Study procedure**

The study protocol for the SOT was the same for all participants. In addition, women  
with FM also fulfilled the Spanish version of the Fibromyalgia Impact Questionnaire  
(FIQ)<sup>23</sup> to assess FM-related disability<sup>24</sup>. All participants were verbally informed of the  
study, accepted the informed consent, and were familiarized with the different outcomes  
before starting data collection.

First, the SOT protocol was performed and subsequently participants completed the  
remaining assessments. All assessments were performed at a similar time of the day in  
the Laboratory for Movement analysis, Biomechanics, Ergonomics and Motor Control

(LAMBECOM) located at the Department of Physical Therapy, Occupational Therapy, Rehabilitation and Physical Medicine, Universidad Rey Juan Carlos (Spain).

The Functional Independence Measure (FIM) assessment took place in a suitably equipped apartment, via observation of subject's functional independence demonstrated during the performance of ADL contained in the scale. An external evaluator, blinded to the participant's condition, performed the assessments.

## **Outcome measures**

### ***Functional independence measure (FIM)***

The FIM provides an assessment of the level of functional independence in daily life activities<sup>25</sup>. It also provides information primarily on cognitive and motor performance via 18 items. Scores range from 1-7, with higher scores corresponding to a higher level of functional independence. The possible score ranges from 18 to 126 points. The FIM includes observation and face-to-face interviews. This tool has demonstrated excellent psychometric properties<sup>26-28</sup>.

### ***Sensory Organization Test (SOT)***

The posturography device used in the current study was the SOT assessment, which belongs to the Smart Balance Master©, by Neurocom® EQ0501, International, Inc (Oregon USA)<sup>29,30</sup>. The device consists of a platform connected to symmetrically placed transducers measuring the vertical and horizontal shear forces exercised through the anterior-posterior axis in the plane parallel to the floor. It is also equipped with a mobile visual surround screen. Both the visual surround and platform are computer-controlled and can move simultaneously. This device was connected to a PC Pentium I, with Smart Balance Master 5.0 software and a Samsung® monitor. The reports obtained for each participant were saved on the computer's hard drive.

1  
2  
3 To conduct the SOT, an individual's postural sway, and thereby balance is measured  
4 under 6 different conditions during standing. During these tests, the base of support and  
5 the visual surround screen can move according to the patient's balancing responses and  
6 the strategy used for maintaining an upright position. For instance, no altered stimuli are  
7 given in condition 1; whereas visual information is removed in condition 2, by asking  
8 the participant to close the eyes. In condition 3, the visual surround is moving with the  
9 subject's anterior-posterior body sway, whereas in condition 4, the platform rotates with  
10 the subject's anterior-posterior body sway. In condition 5, subjects close their eyes and  
11 the platform moves with the subject anterior-posterior body sway. Finally, in condition  
12 6, the visual screen and the platform are moved with the subject's anterior-posterior  
13 body sway. Briefly, the 6 conditions can be resumed as follows: 1) eyes open, fixed  
14 surround and support platform; 2) eyes closed, fixed surround and support platform; 3)  
15 eyes open, moving surround (moving proportional to the angle of anterior-posterior  
16 body sway) and fixed support platform; 4) eyes open, fixed surround and moving  
17 support platform (moving proportional to the angle of anterior-posterior body sway); 5)  
18 eyes closed, fixed surround and moving support platform; and 6) eyes open, moving  
19 surround and support platform. Tests were always performed following these steps in  
20 order. Each condition was performed 3 consecutive times and the mean was considered  
21 in the analysis. In total, the duration of the tests lasted approximately 12 minutes for  
22 each patient; therefore, it can be considered a non-fatiguing assessment. This procedure  
23 has shown good test-retest reliability in healthy people<sup>31</sup>.

24  
25  
26  
27  
28  
29  
30  
31  
32  
33  
34  
35  
36  
37  
38  
39  
40  
41  
42  
43  
44  
45  
46  
47  
48  
49 Participants were encouraged to maintain their stability and center of gravity, despite  
50 the movement of the visual surround or the base of support. The participant's center of  
51 gravity was displayed on the upper half of the screen. The feet were correctly positioned  
52 facing the visual surround during the entire test. If the participant fell, took a step or  
53  
54  
55  
56  
57  
58  
59  
60



1  
2  
3 touched the visual surround, the test was interrupted and the fall was registered. Data  
4  
5 assessments were performed automatically and compared with theoretical normative  
6  
7 electronic data. The score of each condition consist of a percentage that compares the  
8  
9 subject anterior-posterior center of pressure sway with the theoretical limits of stability.  
10  
11 The score is registered on a bar chart ranging from 0% to 100% where 0% represents  
12  
13 the least stable (fall) and 100% indicates perfect stability<sup>29</sup>.  
14  
15

16  
17 In addition, combination of the results obtained in the different conditions provides a  
18  
19 ratio score of each sensory system (somato-sensory, vestibular, or visual). The somato-  
20  
21 sensory ratio (condition 2/condition 1) determines how successfully a person uses input  
22  
23 from the somato-sensory system for balance; the visual ratio (condition 4/condition 1)  
24  
25 determines how successfully a person uses visual system for balance; and the vestibular  
26  
27 ratio (condition 5/condition 1) determines how successfully a person uses input from the  
28  
29 vestibular system for balance.  
30  
31

32  
33 Finally, a strategy score for each SOT condition is also calculated with scores near  
34  
35 100 indicating use of an ankle strategy and scores near 0 indicating a hip strategy  
36

### 37 38 **Sample Size Calculation**

39  
40 The sample size was calculated using the Ene 3.0 software (Autonomic University of  
41  
42 Barcelona, Spain). The sample calculation was based on detecting significant moderate  
43  
44 correlations ( $r=0.60$ ) between the SOT conditions and FIM variables with an alpha level  
45  
46 ( $\alpha$ ) of 0.05, and a desired power ( $\beta$ ) of 80%. This generated a sample size of at least 19  
47  
48 subjects.  
49

### 50 51 **Statistical Analysis**

52  
53 The SPSS statistical package was used for data analysis (version 19.0, SPSS Inc,  
54  
55 Chicago, IL, USA). The Kolmogorov-Smirnov test was used to analyze the normal  
56  
57 distribution of the variables ( $P>0.05$ ). Quantitative data without a normal distribution  
58  
59  
60

(clinical data and FIM scores) were analyzed with non-parametric tests and those data with a normal distribution (SOT conditions) were analyzed with parametric tests. A 2x6 analysis of variance (ANCOVA) with group (FM or controls) as a between-subjects factor and with condition of the SOT (from 1 to 6) as a within-subjects factor was and body mass index as covariate used to analyze differences in the assessments of balance responses and strategies used for maintaining the upright position in the SOT. The main hypothesis of interest was the Group \* Condition interaction. Further, unpaired Student t-tests were also conducted to determine between-groups difference for the ratio score of each sensory system (somato-sensory, vestibular, or visual). Finally, the Spearman's rho (rs) test was used to analyze potential associations between the clinical variables related to symptoms, disability, FIM and SOT conditions in the FM group. The statistical analysis was generally conducted at a 95% significance level; but, we corrected for multiple comparisons using the Holm-Bonferroni adjustment<sup>32</sup> assuming a significant alpha level of 0.008 (6 independent-samples t-tests by SOT condition).

## RESULTS

### Demographic and clinical data

Twenty-nine (n =29) women with FM were screened for eligibility criteria between January and November 2015. Nine women were excluded as follows: previous surgery (n=3), whiplash syndrome (n=2), pregnancy (n=2), diabetes (n=1) and litigation (n=1). The final sample consisted of 20 women with FM aged 35-55 years old (mean: 48±6 years) who satisfied all the eligibility criteria and agreed to participate. In addition, 20 matched healthy women; aged 35-56 years old (mean: 47±6 years) were also included. There were no significant differences in age (P=0.909) or body mass index (control: 23.8 ±1.3; FM: 24.2±1.5, P=0.508) between both groups. All participants were right-

1  
2  
3 handed. Seventeen (85%) women with FM (85%) were regularly taking non-steroidal  
4 anti-inflammatory medications. The FIQ revealed a moderate disability with a mean  
5 score of 57.9 (95%CI 53.1-62.6). All participants completed all assessments and there  
6 were no missing data.  
7  
8  
9

### 10 11 **Fibromyalgia and SOT**

12  
13  
14 The ANCOVA revealed significant differences between groups ( $F=21.634$ ;  $P<0.001$ )  
15 and conditions ( $F=45.164$ ;  $P<0.001$ ) for the balance responses on the SOT: women with  
16 FM displayed significantly ( $P=0.005$ ) lower values in all SOT conditions than healthy  
17 women and scores of conditions 4-6 were significantly lower (all,  $P<0.01$ ) than those  
18 for conditions 1-3 (table 1). A significant Group \* Condition interaction was also found  
19 ( $F=3.404$ ;  $P=0.006$ ): differences between conditions 4-6 scores and conditions 1-3 were  
20 significantly more pronounced within the FM group. No effect of the body mass index  
21 was observed.  
22  
23  
24  
25  
26  
27  
28  
29  
30

31  
32 We found significant ( $t=2.901$ ;  $P=0.006$ ) lower vestibular ratio score in women with  
33 FM (mean:  $0.55\pm 0.2$ ) as compared to healthy women (mean:  $0.72\pm 0.15$ ). No significant  
34 differences in somato-sensory ( $t=0.011$ ;  $P=0.989$ ) and visual ( $t=1.900$ ;  $P=0.065$ ) ratios  
35 between women with FM (somato-sensory:  $0.95\pm 0.03$ ; visual:  $0.82\pm 0.15$ ) and healthy  
36 women (somato-sensory:  $0.96\pm 0.03$ ; visual:  $0.90\pm 0.1$ ) were observed.  
37  
38  
39  
40  
41  
42

43 ***[Insert table 1 about here]***

44  
45 The ANCOVA also revealed significant between-groups ( $F=10.456$ ;  $P<0.001$ )  
46 and between-conditions ( $F=35.301$ ;  $P<0.001$ ) differences for the balance strategies used  
47 during the SOT conditions: FM women displayed significantly lower values ( $P<0.001$ )  
48 in all conditions than healthy women (table 1) suggesting a greater use of the hip instead  
49 the ankle. Again, scores on conditions 4-6 were lower than those values for conditions  
50  
51  
52  
53  
54  
55  
56  
57  
58  
59  
60

1  
2  
3 1-3 ( $P<0.001$ ). No significant Group x Condition interaction ( $F=1.170$ ;  $P=0.325$ ) or  
4  
5 effect of the body mass index was observed.  
6

### 7 **Correlations between clinical variables and SOT conditions in fibromyalgia**

8  
9 Within the group of women with FM, no significant correlation was found between  
10  
11 the duration (years) of neither pain nor the intensity of the symptoms with any of the  
12  
13 SOT conditions. Table 2 displays correlation coefficients and the statistical significance  
14  
15 for all conditions in the balance section, whereas table 3 displays the same data for each  
16  
17 condition within the strategy section.  
18  
19

20  
21 *[Insert table 2 about here]*

22  
23 *[Insert table 3 about here]*

### 24 **Correlations between functionality and SOT conditions**

25  
26 Positive correlations between different SOT conditions and different ADLs variables  
27  
28 were found in the group of women with FM (table 4). The balance condition N°6 (eyes  
29  
30 open, mobile visual surround-mobile platform) was moderately associated with bathing  
31  
32 activity ( $r_s=0.541$ ;  $P<0.001$ ) whereas conditions 2 and 3 were positively and moderately  
33  
34 associated with bed transfers activity ( $r_s=0.491$ ;  $P<0.001$ ; and  $r_s=0.510$ ;  $P<0.001$ ,  
35  
36 respectively): the lower the score balance in these conditions, the poorer the function in  
37  
38 the respective ADLs.  
39  
40  
41

42  
43 *[Insert table 4 about here]*

44  
45 Similarly, significant positive correlations were found between positioning strategy  
46  
47 number 6 and the following ADLs: dressing upper body ( $r_s=0.530$ ;  $P<0.001$ ), dressing  
48  
49 the lower body ( $r_s=0.562$ ;  $P<0.001$ ) and toileting ( $r_s=0.521$ ;  $P<0.001$ ): the worse the  
50  
51 balance strategy, the greater interference with functional independence in these ADL.  
52  
53  
54  
55  
56  
57  
58  
59  
60

## DISCUSSION

The current study found that women with FM exhibit worse balance scores compared to healthy women as assessed with the SOT, in agreement with previous studies<sup>16,18</sup>. In fact, differences were higher with the eyes closed and moving surroundings surfaces. Further, the strategy used for stabilizing the ankle joint was poor in women with FM. Nevertheless, the most significant contribution of the current study was the association of balance scores with functional independence during ADL.

Women with FM exhibited lower scores in all SOT conditions compared to healthy women suggesting poor balance. Our results agree with those previously observed by Jones et al<sup>16</sup> and Russek and Fulk<sup>18</sup> who also reported significantly lower scores in all SOT conditions in individuals with FM. It is interesting to note that the scores observed in our study were similar to those reported in these previous studies<sup>16,18</sup>. Current and previous evidence would suggest that subjects with FM exhibit poor general balance as compared to healthy women. Nevertheless, although all SOT conditions showed lower scores in FM, the vestibular ratio was the most significantly impaired in our sample of women with FM. This may be related to the fact that scores in the last SOT conditions (4 to 6) were significantly much lower in the FM group than in the healthy group. As previously suggested, lower scores in conditions 4 to 6 compared to conditions 1 to 3 suggest a degree of somato-sensory dependence<sup>15</sup>. This hypothesis is in line with the study by De Brujin et al<sup>33</sup> who found that balance in patients with FM was more optimal on firm and regular surfaces. In fact, Russek and Fulk<sup>18</sup> and the current study did not find significant differences within the somato-sensory system ratio between individuals with FM and healthy people, suggesting that it is the vestibular, and probably the visual, system<sup>16,18</sup> the most affected in this population.

1  
2  
3 To determine the mechanisms related to poor balance in patients with FM is beyond  
4 the scope of the current study, but some hypotheses have been proposed. Since FM is  
5 characterized by abnormal nociceptive processing, it is possible that multiple processing  
6 disturbances may lead to poor balance. Additionally, other processing abnormalities of  
7 the central nervous system, e.g., cognitive dysfunction, could also contribute to postural  
8 instability. In fact, Bayazit et al<sup>34</sup> suggested that women with FM have neural brainstem  
9 disintegration which could lead to abnormal perception of audio-vestibular inputs and to  
10 abnormal auditory brainstem response. Current and previous finding demonstrating that  
11 the vestibular system was the most affected in individuals with FM would support this  
12 hypothesis. Nevertheless, since we did not specifically evaluate the function of the  
13 vestibular system in our sample of women with FM, the current results do not permit to  
14 determine whether the low scores on the vestibular component of the SOT were due to  
15 peripheral or central deficits.  
16  
17  
18  
19  
20  
21  
22  
23  
24  
25  
26  
27  
28  
29  
30

31  
32 Additionally to lower balance scores, we also observed that our sample of women  
33 with FM also used different strategy than healthy women for maintaining their balance.  
34 The SOT strategy scores indicate that woman with FM use a hip strategy to maintain  
35 their balance whereas healthy women use a more ankle strategy. Some possible reasons  
36 for these changes in balance strategy can be the presence of muscle trigger points in the  
37 gastrocnemius and tibialis anterior muscles<sup>16</sup> or the greater muscle fatigue in the tibialis  
38 anterior muscle<sup>35</sup> observed in FM. Future studies should investigate neurophysiological  
39 mechanisms related to changes in balance strategy in subjects with FM.  
40  
41  
42  
43  
44  
45  
46  
47  
48

49  
50 The most relevant result of our study was the positive association between balance  
51 scores and functional independence during ADL since the greater the loss of postural  
52 balance, the greater the interference with those ADL activities requiring proper postural  
53 control and balance, e.g., bathing and dressing. These findings are valuable for planning  
54  
55  
56  
57  
58  
59  
60

1  
2  
3 proper treatment interventions, since deficits or loss of independence in these ADLs has  
4  
5 a negative impact on the quality of life of the patients. Our results agree with the study  
6  
7 by Amris et al<sup>36</sup> who investigated women with widespread chronic pain symptoms and  
8  
9 observed that patients with FM have substantial problems affecting their daily life and  
10  
11 are liable to need community support. Therefore, current findings can help for planning  
12  
13 multidisciplinary interventions for individuals with FM. For instance, balance strategies  
14  
15 and postural control can be treated with physical therapy whereas therapeutic strategies  
16  
17 for improvement of ADL efficacy should be applied by occupational therapists. Further,  
18  
19 cognitive behaviors or fear to movement can be benefit from psychological approaches.  
20  
21

22  
23 Finally, this study presents several limitations. First, although significant differences  
24  
25 were found between groups, these were based on a small sample size. Nevertheless, we  
26  
27 believe that a large sample size would not alter the direction of our findings. Further, the  
28  
29 population included was recruited from a regional hospital, which makes generalization  
30  
31 of the results to the general population difficult. Consequently, further epidemiological  
32  
33 studies with larger sample sizes are needed to enable a more generalized interpretation  
34  
35 of the results. Second, we analyzed around 264 correlations in our study. It is possible  
36  
37 that a Type I error would be present. A greater sample size would help to elucidate if the  
38  
39 significant association observed in the current study are further significant or not. Third,  
40  
41 we only included women diagnosed with FM. It is unknown whether men with FM  
42  
43 would also exhibit similar results. Fourth, we excluded women with FM and comorbid  
44  
45 depressive symptoms, so extrapolation of our results to this subgroup of patients with  
46  
47 FM should be considered with caution. Although it seems that depression or anxiety  
48  
49 may affect balance<sup>37</sup>; we do not know the effect of depression in the outcomes  
50  
51 included in our study, particularly those related to the FIM. Fifth, as fatigue is a  
52  
53  
54  
55  
56  
57  
58  
59  
60

1  
2  
3 common denominator in individuals with FM, it was unknown whether the inclusion of  
4  
5 several functional outcomes could be affected by rest-periods.  
6  
7

## 8 9 **CONCLUSIONS**

10  
11 Women with FM exhibit poor balance and use different strategies for maintaining  
12 upright posture as compared to healthy women which may be associated to disturbances  
13 of the vestibular system. Additionally, balance deficits are associated with a negative  
14 impact on functional independence in ADL. Multidisciplinary treatments directed at  
15 improving the problems faced during ADLs may help improve the autonomy of women  
16 with FM.  
17  
18  
19  
20  
21  
22  
23  
24  
25  
26

## 27 **Competing interests**

28  
29 All authors declare: no support from any organization for the submitted work; no  
30 financial relationships with any organizations that might have an interest in the  
31 submitted work in the previous three years, no other relationships or activities that could  
32 appear to have influenced the submitted work.  
33  
34  
35  
36  
37  
38  
39  
40

## 41 **Funding**

42  
43 This research received no specific grant from any funding agency in the public,  
44 commercial, or not-for-profit sectors.  
45  
46  
47  
48  
49  
50

## 51 **Data sharing statement**

52  
53 No additional data are available.  
54  
55  
56  
57  
58  
59  
60



### Contributor-ship Information

- Concept development (provided idea for the research): Marta Pérez de Heredia Torres.
- Design (plane the methods to generate the results): Marta Pérez de Heredia Torres, Elisabet Huertas Hoyas, Rosa Martínez Piédrola, Domingo Palacios Ceña, Jorge Alegre Ayala, Montserrat Santamaría Vázquez, César Fernández de las Peñas.
- Supervision (provided oversight, responsible for organization and implementation, writing of the manuscript): Marta Pérez de Heredia Torres, Elisabet Huertas Hoyas and César Fernández de las Peñas.
- Datta Collection/processing (responsible for experiments, patient management, organization, or reporting data): Rosa Martínez Piédrola, Domingo Palacios Ceña, and Montserrat Santamaría Vázquez.
- Analysis/interpretation (responsible for statistical analysis, evaluation, and presentation of the results): Marta Pérez de Heredia Torres, Elisabet Huertas Hoyas, Domingo Palacios Ceña, Jorge Alegre Ayala, César Fernández de las Peñas.
- Literature search (performed the literature search): Marta Pérez de Heredia Torres, Elisabet Huertas Hoyas, Rosa Martínez Piédrola, Domingo Palacios Ceña, and Montserrat Santamaría Vázquez.
- Writing (responsible for writing a substantive part of the manuscript): Marta Pérez de Heredia Torres, Elisabet Huertas Hoyas, Rosa Martínez Piédrola, Domingo Palacios Ceña, Jorge Alegre Ayala, Montserrat Santamaría Vázquez, César Fernández de las Peñas.
- Critical review (revised manuscript for intellectual content, this does not relate to spelling and grammar checking): Marta Pérez de Heredia Torres, Elisabet Huertas Hoyas and César Fernández de las Peñas.

## REFERENCES

- [1] Branco JC, Bannwarth B, Failde I et al. Prevalence of fibromyalgia: a survey in five European countries. *Semin Arthritis Rheum* 2010; 39: 448-53. .
- [2] Villanueva VL, Valía JC, Cerdá G, MonsalveV, Bayona MJ, De Andrés J. [Fibromyalgia: diagnosis and treatment. Current knowledge]. *Rev Soc Española Dolor* 2004; 11:430-43.
- [3] Mitani Y, Fukunaga M, Kanbara K, Takebayashi N, Ishino S, Nakai Y. Evaluation of psychophysiological asymmetry in patients with fibromyalgia syndrome. *Appl Psychophysiol Biofeedback* 2006; 31: 217–25.
- [4] Westgaard RH. Muscle activity as a releasing factor for pain in the shoulder and neck. *Cephalalgia* 1999; 19: S1-S8.
- [5] Bennett RM, Jones J, Turk DC, Russell IJ, Matallana L. An internet survey of 2,596 people with fibromyalgia. *BMC Musculoskelet Disord* 2007; 8: 27
- [6] Katz R, Ferbert S, Leavitt F. Fibromyalgia patients report many symptoms other than pain and fatigue. *Arthritis Rheum* 2007; 56: 1532
- [7] Müller W, Kelemen J, Stratz T. Spinal factors in the generation of fibromyalgia syndrome. *Z Rheumatol* 1998;57: S36-S42.
- [8] Latorre-Román P., Santos-Campos M., Heredia-Jimenez J., Delgado-Fernández M., Soto-Hermoso V. Analysis of the performance of women with fibromyalgia in the six-minute walk test and its relation with health and quality of life. *J. Sports Med Phys Fit* 2014; 54: 511-7
- [9] Meireles SA, Antero DC, Kulczycki MM, Skare TL. Prevalence of falls in fibromyalgia patients. *Acta Orto Brasil* 2014; 22: 163-66.
- [10] Jones KD, Horak FB, Winters Stone K, Irvine JM, Bennett RM. Fibromyalgia is associated with impaired balance and falls. *J Clin Rheumatol* 2009; 15: 16-21.

1  
2  
3 [11] Akkaya N, Akkaya S, Atalay NS, Acar M, Catalbas N, Sahin F. Assessment of  
4 the relationship between postural stability and sleep quality in patients with  
5 fibromyalgia. *Clin Rheumatol* 2013; 32: 325-31  
6  
7

8  
9 [12] Simms RW, Roy SH, Hrovat M et al. Lack of association between fibromyalgia  
10 syndrome and abnormalities in muscle energy metabolism. *Arthritis Rheum* 1994;  
11 37: 794-800.  
12  
13

14 [13] Galeano D, Brunetti F, Torricelli D, Piazza S, Pons JL. A tool for balance  
15 control training using muscle synergies and multimodal interfaces. *BioMed Res*  
16 *Inter* 2014; 2014:565-70.  
17  
18

19 [14] Leitner C, Mair P, Paul B, Wick F, Mittermaier C, Sycha T, Ebenbichler G.  
20 Reliability of posturographic measurements in the assessment of impaired  
21 sensorimotor function in chronic low back pain. *J Electrom Kines* 2009; 19: 380-90.  
22  
23

24 [15] Barona R. Posturografía. En: Bartual J, Pérez N (eds). *El sistema vestibular y*  
25 *sus alteraciones*. Barcelona, Masson: 1988. Pp 150-5.  
26  
27

28 [16] Jones KD, King LA, Mist SD, Bennett RM, Horak FB. Postural control deficits  
29 in people with fibromyalgia: a pilot study. *Arthritis Res Ther* 2011; 13: R127.  
30  
31

32 [17] Muto L, Mango P, Sauer J, Yuan S, Sousa A, Marques A. Postural control and  
33 balance self efficacy in women with fibromyalgia. Are there differences? *Eur J*  
34 *Physl Rehabil Med* 2015; 51: 149-54.  
35  
36

37 [18] Russek LN, Fulk G. Pilot study assessing balance in women with fibromyalgia  
38 syndrome. *Physiother Theory Pract* 2009; 25: 555-65.  
39  
40

41 [19] Wolfe F, Smythe HA, Yunus M et al. The American College of Rheumatology.  
42 Criteria for the classification of fibromyalgia. Report of the multicenter criteria  
43 comitee. *Arthritis Rheum* 1990; 33: 160-72.  
44  
45  
46  
47  
48  
49  
50  
51  
52  
53  
54  
55  
56  
57  
58  
59  
60

1  
2  
3 [20] Wolfe F, Clauw DJ, Fitzcharles MA et al. The American College of  
4 Rheumatology preliminary diagnostic criteria for fibromyalgia and measurement of  
5 symptom severity. *Arthritis Care Res* 2010; 62: 600-10.  
6  
7

8  
9 [21] Segura-Jiménez V, Aparicio VA, Álvarez-Gallardo IC, Soriano-Maldonado A,  
10 Estévez-López F, Delgado-Fernández M et al. Validation of the modified 2010  
11 American College of Rheumatology diagnostic criteria for fibromyalgia in a  
12 Spanish population. *Rheumatology* 2014; 53: 1803-11.  
13  
14

15  
16 [22] Segura-Jiménez V, Soriano-Maldonado A, Álvarez-Gallardo IC, Estévez-López  
17 F, Carbonell-Baeza A, Delgado-Fernández M. Subgroups of fibromyalgia patients  
18 using the 1990 American College of Rheumatology criteria and the modified 2010  
19 preliminary diagnostic criteria: the al-Ándalus project. *Clin Exp Rheumatol* 2016;  
20 34: S26-33.  
21  
22

23  
24 [23] Esteve Vives JJ, Rivera J, Salvat Salvat I, Gracia Blanco M, Alegre de Miguel  
25 C. Proposal for a consensus version of the Fibromyalgia Impact Questionnaire (FIQ)  
26 for the Spanish population. *Reumatol Clin* 2007; 3: 21-24.  
27  
28

29  
30 [24] Burckhardt CS, Clark SR, Bennett R. The Fibromyalgia Impact Questionnaire:  
31 development and validation. *J Rheumatol* 1991;18: 728-33.  
32  
33

34  
35 [25] Guide for the Uniform Data Set for Medical Rehabilitation (Adult FIM).  
36 Version 4.0., Buffalo (Nueva York): State University of New York at Buffalo; 1993.  
37  
38

39  
40 [26] Dodds TA, Martin DP, Stolov WC, Deyo RA. A validation of the functional  
41 independence measurement and its performance among rehabilitation inpatients.  
42  
43 *Arch Phys Med Rehabil* 1993; 74: 531-536  
44

45  
46 [27] Heinemann AW, Linacre JM, Wright BD, Hamilton B, Granger C. Prediction  
47 of rehabilitation outcomes with disability measures. *Arch Phys Med Rehabil* 1994;  
48 75: 133-143  
49  
50  
51  
52  
53  
54  
55  
56  
57  
58  
59  
60

- 1  
2  
3 [28] Hobart JC, Lamping DL, Freeman JA et al. Evidence-based measurement:  
4 which disability scale for neurologic rehabilitation? *Neurology* 2001; 57: 639-644  
5  
6  
7 [29] Nashner LM. Computerized dynamic posturography. In: Jacobson GP,  
8 Newman CW, Kartush JM (editors). *Handbook of balance function and testing*. St.  
9 Louis: Mosby Year Book; 1993. Pp. 280-307  
10  
11  
12 [30] NeuroCom International. Neurocom system operator's manual. Clackamas,  
13 OR: NeuroCom International; 2000  
14  
15  
16 [31] Wrisley DM, Stephens MJ, Mosley S, Wojnowski A, Duffy J, Burkard R.  
17 Learning effects of repetitive administrations of the sensory organization test in  
18 healthy young adults. *Arch Phys Med Rehabil* 2007; 88: 1049-1054  
19  
20  
21 [32] Holm S. A simple sequentially rejective multiple test procedure. *Scand J Stat*  
22 1979; 6: 65-70  
23  
24  
25 [33] de Bruijn ST, van Wjich AJ, Geenen R et al. Relevance of physical fitness  
26 levels and exercise-related beliefs for self-reported and experimental pain in  
27 fibromyalgia: an explorative study. *Clin Rheumatol* 2011; 17: 295-301.  
28  
29  
30 [34] Bayazit YA, Gursoy S, Ozer E et al. Neurotologic manifestations of the  
31 fibromyalgia syndrome *J Neurol Sci* 2002; 196: 77-80  
32  
33  
34 [35] Bazzichi L, Dini M, Rossi A et al. Muscle modifications in fibromyalgic  
35 patients revealed by surface electromyography (SEMG) analysis. *BMC*  
36 *Musculoskelet Disord* 2009; 10: 36  
37  
38  
39 [36] Amris K, Wæhrens EE, Jespersen A, Bliddal H, Danneskiold-Samøe B.  
40 Observation-based assessment of functional ability in patients with chronic  
41 widespread pain: a cross-sectional study. *Pain* 2011; 152: 2470-76.  
42  
43  
44  
45  
46  
47  
48  
49  
50  
51  
52  
53  
54  
55  
56  
57  
58  
59  
60

1  
2  
3 [37] Hassett AL, Simonelli LE, Radvanski DC, Buyske S, Savage SV, Sigal L. The  
4 relationship between affect balance style and clinical outcomes in fibromyalgia.  
5  
6  
7 Arthritis Rheum 2008; 59: 833-40.  
8  
9  
10  
11  
12  
13  
14  
15  
16  
17  
18  
19  
20  
21  
22  
23  
24  
25  
26  
27  
28  
29  
30  
31  
32  
33  
34  
35  
36  
37  
38  
39  
40  
41  
42  
43  
44  
45  
46  
47  
48  
49  
50  
51  
52  
53  
54  
55  
56  
57  
58  
59  
60

For peer review only

**TITLES OF TABLES**

**Table 1:** Differences in the values of the sensory organization test (SOT) between women with FM and healthy women

**Table 2:** Correlations between clinical pain variables and the SOT balance values in women with FM

**Table 3:** Correlations between the clinical pain variables and the SOT strategy values in women with FM

**Table 4:** Correlations between the SOT balance and strategy values and the FIM in women with FM

**Table 1:** Differences in the values of the sensory organization test (SOT) between women with FM and healthy women

|                      | Condition 1#    | Condition 2# | Condition 3# | Condition 4#* | Condition 5#* | Condition 6#* |
|----------------------|-----------------|--------------|--------------|---------------|---------------|---------------|
|                      | <b>Balance</b>  |              |              |               |               |               |
| <b>Women with FM</b> | 93.1 ± 5.4      | 89.7 ± 4.9   | 86.3 ± 7.0   | 76.5 ± 13.4   | 52.1 ± 18.0   | 54.7 ± 19.4   |
| <b>Healthy women</b> | 95.7 ± 1.3      | 92.3 ± 3.4   | 90.7 ± 5.3   | 86.4 ± 9.3    | 68.4 ± 12.6   | 70.8 ± 11.9   |
|                      | <b>Strategy</b> |              |              |               |               |               |
| <b>Women with FM</b> | 98.5 ± 1.6      | 97.3 ± 4.4   | 96.7 ± 3.4   | 85.7 ± 8.1    | 76.1 ± 12.0   | 78.1 ± 7.6    |
| <b>Healthy women</b> | 98.8 ± 0.6      | 98.7 ± 0.7   | 98.3 ± 1.3   | 91.9 ± 3.2    | 81.2 ± 12.7   | 83.1 ± 11.1   |

Data are expressed as means ± Standard Deviation

# Statistically significant differences between patients and controls (P<0.001; ANCOVA test)

\* Statistically significant differences between conditions 1-3 (P<0.01; ANCOVA test)

Footnote: 1) eyes open, fixed visual surround and fixed support platform; 2) eyes closed, fixed support platform; 3) eyes open, mobile visual surround (moving proportional to the angle of anterior-posterior body sway) and the fixed support platform; 4) eyes open, fixed visual surround and mobile support platform (moving proportional to the angle of anterior-posterior body sway); 5) eyes closed, mobile support platform; and 6) eyes open, mobile visual surround and mobile support platform.



**Table 2:** Correlations between clinical pain variables and the SOT balance values in women with FM

|                    | Duration of symptoms        | Current pain                | Best pain                   | Worse pain                  |
|--------------------|-----------------------------|-----------------------------|-----------------------------|-----------------------------|
| <b>Condition 1</b> | $r_s = 0.124$ ; $P = 0.602$ | $r_s = 0.276$ ; $P = 0.239$ | $r_s = 0.242$ ; $P = 0.304$ | $r_s = 0.169$ ; $P = 0.476$ |
| <b>Condition 2</b> | $r_s = 0.291$ ; $P = 0.213$ | $r_s = 0.051$ ; $P = 0.830$ | $r_s = 0.334$ ; $P = 0.149$ | $r_s = 0.179$ ; $P = 0.450$ |
| <b>Condition 3</b> | $r_s = 0.310$ ; $P = 0.183$ | $r_s = 0.152$ ; $P = 0.552$ | $r_s = 0.131$ ; $P = 0.581$ | $r_s = 0.127$ ; $P = 0.593$ |
| <b>Condition 4</b> | $r_s = 0.308$ ; $P = 0.186$ | $r_s = 0.084$ ; $P = 0.736$ | $r_s = 0.076$ ; $P = 0.749$ | $r_s = 0.07$ ; $P = 0.769$  |
| <b>Condition 5</b> | $r_s = 0.135$ ; $P = 0.571$ | $r_s = 0.111$ ; $P = 0.642$ | $r_s = 0.151$ ; $P = 0.526$ | $r_s = 0.219$ ; $P = 0.354$ |
| <b>Condition 6</b> | $r_s = 0.123$ ; $P = 0.606$ | $r_s = 0.050$ ; $P = 0.835$ | $r_s = 0.156$ ; $P = 0.511$ | $r_s = 0.156$ ; $P = 0.512$ |

$r_s$  = Spearman's correlation test (Spearman's rho)

**Table 3:** Correlations between the clinical pain variables and the SOT strategy values in women with FM

|                    | Duration of symptoms      | Current pain              | Best pain                 | Worse pain                |
|--------------------|---------------------------|---------------------------|---------------------------|---------------------------|
| <b>Condition 1</b> | $r_s = -0.088; P = 0.713$ | $r_s = 0.076; P = 0.749$  | $r_s = 0.204; P = 0.388$  | $r_s = 0.047; P = 0.846$  |
| <b>Condition 2</b> | $r_s = 0.124; P = 0.602$  | $r_s = -0.032; P = 0.894$ | $r_s = -0.399; P = 0.082$ | $r_s = -0.210; P = 0.613$ |
| <b>Condition 3</b> | $r_s = 0.123; P = 0.604$  | $r_s = -0.073; P = 0.759$ | $r_s = -0.040; P = 0.867$ | $r_s = -0.022; P = 0.926$ |
| <b>Condition 4</b> | $r_s = -0.069; P = 0.772$ | $r_s = -0.161; P = 0.498$ | $r_s = -0.118; P = 0.621$ | $r_s = -0.130; P = 0.585$ |
| <b>Condition 5</b> | $r_s = 0.036; P = 0.879$  | $r_s = 0.046; P = 0.848$  | $r_s = -0.140; P = 0.555$ | $r_s = 0.380; P = 0.098$  |
| <b>Condition 6</b> | $r_s = -0.097; P = 0.685$ | $r_s = -0.086; P = 0.718$ | $r_s = -0.010; P = 0.966$ | $r_s = -0.151; P = 0.525$ |

$r_s$  = Spearman's correlation test (Spearman's rho)

**Table 4:** Correlations between the SOT balance and strategy values and the FIM in women with FM

|                     | Balance |         |         |        |        |         | Strategy |        |        |         |        |         |
|---------------------|---------|---------|---------|--------|--------|---------|----------|--------|--------|---------|--------|---------|
|                     | 1       | 2       | 3       | 4      | 5      | 6       | 1        | 2      | 3      | 4       | 5      | 6       |
| Eating              | .280    | .179    | .246    | .251   | .246   | .350*   | .175     | .258   | .185   | .222    | .154   | .222    |
| Grooming            | .316*   | .288    | .308*   | .375** | .428** | .451**  | .002     | .108   | .154   | .423**  | .252   | .423**  |
| Bathing/showering   | .314*   | .469**  | .481**  | .429** | .491** | .541*** | .256     | .434** | .436** | .427**  | .402*  | .427**  |
| Dressing upper body | .311*   | .323*   | .301    | .458** | .343*  | .307*   | .136     | .232   | .313*  | .530**  | .450** | .530*** |
| Dressing lower body | .401**  | .448**  | .336*   | .373** | .351*  | .438**  | .100     | .237   | .336*  | .562*** | .469** | .562*** |
| Toileting           | .251    | .376**  | .258    | .259   | .251   | .483**  | .055     | .223   | .273   | .521**  | .430** | .521*** |
| Bowel management    | -.165   | -.020   | -.131   | .062   | .187   | -.165*  | -.212    | -.076  | -.221  | .141    | .030   | .141    |
| Bladder management  | .064    | -.051   | -.002   | .204   | .083   | .064    | .087     | .061   | .099   | .086    | .303   | .086    |
| Chair-bed transfers | .325*   | .491*** | .510*** | .433** | .451** | .441**  | .220     | .456** | .378** | .389**  | .422** | .389**  |
| Toilet transfers    | .195    | .223    | .282    | .453** | .255   | .197    | .145     | .318*  | .377** | .452**  | .418** | .452**  |
| Bath transfers      | .417*   | .441    | .354    | .321   | .257   | .405    | .257     | .314*  | .351** | .558*** | .407** | .558*** |
| Locomotion          | .110    | -.172   | -.039   | -.009  | -.158  | -.192   | .105     | .132   | .141   | -.133   | .000   | -.133   |
| Stairs              | .365*   | .238    | .079    | .164   | .212   | .164    | .159     | .154   | .050   | .176    | .173   | .176    |
| Comprehension       | .205    | .264    | .311*   | .407** | .270   | .281    | .180     | .375** | .254   | .364**  | .250   | .364**  |
| Expression          | .097    | .095    | .113    | .477** | .247   | .372*   | -.187    | -.108  | -.144  | .306*   | -.061  | .306*   |
| Social interaction  | .285    | .220    | .303    | .212   | .005   | .088    | .239     | .398** | .424** | .269    | .158   | .269    |
| Problem solving     | .192    | .220    | .245    | .307*  | .364*  | .261    | -.018    | .033   | -.006  | .197    | -.008  | .197    |
| Memory              | .311*   | .340*   | .384**  | .468** | .396** | .449**  | .069     | .156   | .314*  | .393**  | .267   | .393**  |

\* P<0.05; \*\* P<0.01; \*\*\* P<0.001

Footnote: 1) eyes open, fixed visual surround and fixed support platform; 2) eyes closed, fixed support platform; 3) eyes open, mobile visual surround (moving proportional to the angle of anterior-posterior body sway) and the fixed support platform; 4) eyes open, fixed visual surround and mobile support platform (moving proportional to the angle of anterior-posterior body sway); 5) eyes closed, mobile support platform; and 6) eyes open, mobile visual surround and mobile support platform.

## STROBE Statement—checklist of items that should be included in reports of observational studies

**Balance deficiencies in women with fibromyalgia assessed using computerized dynamic posturography**

|                              | Item No | Recommendation                                                                                                                                                                                                                                                                                                                                                                                                                                                         | Page |
|------------------------------|---------|------------------------------------------------------------------------------------------------------------------------------------------------------------------------------------------------------------------------------------------------------------------------------------------------------------------------------------------------------------------------------------------------------------------------------------------------------------------------|------|
| <b>Title and abstract</b>    | 1       | (a) Indicate the study's design with a commonly used term in the title or the abstract                                                                                                                                                                                                                                                                                                                                                                                 | 2    |
|                              |         | (b) Provide in the abstract an informative and balanced summary of what was done and what was found                                                                                                                                                                                                                                                                                                                                                                    | 2    |
| <b>Introduction</b>          |         |                                                                                                                                                                                                                                                                                                                                                                                                                                                                        |      |
| Background/rationale         | 2       | Explain the scientific background and rationale for the investigation being reported                                                                                                                                                                                                                                                                                                                                                                                   | 3-4  |
| Objectives                   | 3       | State specific objectives, including any prespecified hypotheses                                                                                                                                                                                                                                                                                                                                                                                                       | 4    |
| <b>Methods</b>               |         |                                                                                                                                                                                                                                                                                                                                                                                                                                                                        |      |
| Study design                 | 4       | Present key elements of study design early in the paper                                                                                                                                                                                                                                                                                                                                                                                                                | 4    |
| Setting                      | 5       | Describe the setting, locations, and relevant dates, including periods of recruitment, exposure, follow-up, and data collection                                                                                                                                                                                                                                                                                                                                        | 4    |
| Participants                 | 6       | (a) <i>Cohort study</i> —Give the eligibility criteria, and the sources and methods of selection of participants. Describe methods of follow-up<br><i>Case-control study</i> —Give the eligibility criteria, and the sources and methods of case ascertainment and control selection. Give the rationale for the choice of cases and controls<br><i>Cross-sectional study</i> —Give the eligibility criteria, and the sources and methods of selection of participants | 4-5  |
|                              |         | (b) <i>Cohort study</i> —For matched studies, give matching criteria and number of exposed and unexposed<br><i>Case-control study</i> —For matched studies, give matching criteria and the number of controls per case                                                                                                                                                                                                                                                 |      |
| Variables                    | 7       | Clearly define all outcomes, exposures, predictors, potential confounders, and effect modifiers. Give diagnostic criteria, if applicable                                                                                                                                                                                                                                                                                                                               | 7-8  |
| Data sources/<br>measurement | 8*      | For each variable of interest, give sources of data and details of methods of assessment (measurement). Describe comparability of assessment methods if there is more than one group                                                                                                                                                                                                                                                                                   |      |
| Bias                         | 9       | Describe any efforts to address potential sources of bias                                                                                                                                                                                                                                                                                                                                                                                                              |      |
| Study size                   | 10      | Explain how the study size was arrived at                                                                                                                                                                                                                                                                                                                                                                                                                              | 8-9  |
| Quantitative variables       | 11      | Explain how quantitative variables were handled in the analyses. If applicable, describe which groupings were chosen and why                                                                                                                                                                                                                                                                                                                                           | 8    |
| Statistical methods          | 12      | (a) Describe all statistical methods, including those used to control for confounding                                                                                                                                                                                                                                                                                                                                                                                  | 8    |
|                              |         | (b) Describe any methods used to examine subgroups and interactions                                                                                                                                                                                                                                                                                                                                                                                                    | 8    |
|                              |         | (c) Explain how missing data were addressed                                                                                                                                                                                                                                                                                                                                                                                                                            |      |
|                              |         | (d) <i>Cohort study</i> —If applicable, explain how loss to follow-up was addressed<br><i>Case-control study</i> —If applicable, explain how matching of cases and controls was addressed<br><i>Cross-sectional study</i> —If applicable, describe analytical methods taking account of sampling strategy                                                                                                                                                              |      |
|                              |         | (e) Describe any sensitivity analyses                                                                                                                                                                                                                                                                                                                                                                                                                                  |      |

| <b>Results</b>           |     |                                                                                                                                                                                                                                                                                                                                                                                                               |          |
|--------------------------|-----|---------------------------------------------------------------------------------------------------------------------------------------------------------------------------------------------------------------------------------------------------------------------------------------------------------------------------------------------------------------------------------------------------------------|----------|
| Participants             | 13* | (a) Report numbers of individuals at each stage of study—eg numbers potentially eligible, examined for eligibility, confirmed eligible, included in the study, completing follow-up, and analysed<br>(b) Give reasons for non-participation at each stage<br>(c) Consider use of a flow diagram                                                                                                               | 8-9<br>9 |
| Descriptive data         | 14* | (a) Give characteristics of study participants (eg demographic, clinical, social) and information on exposures and potential confounders<br>(b) Indicate number of participants with missing data for each variable of interest<br>(c) <i>Cohort study</i> —Summarise follow-up time (eg, average and total amount)                                                                                           | 8-9<br>9 |
| Outcome data             | 15* | <i>Cohort study</i> —Report numbers of outcome events or summary measures over time<br><i>Case-control study</i> —Report numbers in each exposure category, or summary measures of exposure<br><i>Cross-sectional study</i> —Report numbers of outcome events or summary measures                                                                                                                             | 9-10     |
| Main results             | 16  | (a) Give unadjusted estimates and, if applicable, confounder-adjusted estimates and their precision (eg, 95% confidence interval). Make clear which confounders were adjusted for and why they were included<br>(b) Report category boundaries when continuous variables were categorized<br>(c) If relevant, consider translating estimates of relative risk into absolute risk for a meaningful time period | 8        |
| Other analyses           | 17  | Report other analyses done—eg analyses of subgroups and interactions, and sensitivity analyses                                                                                                                                                                                                                                                                                                                |          |
| <b>Discussion</b>        |     |                                                                                                                                                                                                                                                                                                                                                                                                               |          |
| Key results              | 18  | Summarise key results with reference to study objectives                                                                                                                                                                                                                                                                                                                                                      | 10-11    |
| Limitations              | 19  | Discuss limitations of the study, taking into account sources of potential bias or imprecision. Discuss both direction and magnitude of any potential bias                                                                                                                                                                                                                                                    | 12       |
| Interpretation           | 20  | Give a cautious overall interpretation of results considering objectives, limitations, multiplicity of analyses, results from similar studies, and other relevant evidence                                                                                                                                                                                                                                    | 12-13    |
| Generalisability         | 21  | Discuss the generalisability (external validity) of the study results                                                                                                                                                                                                                                                                                                                                         | 12       |
| <b>Other information</b> |     |                                                                                                                                                                                                                                                                                                                                                                                                               |          |
| Funding                  | 22  | Give the source of funding and the role of the funders for the present study and, if applicable, for the original study on which the present article is based                                                                                                                                                                                                                                                 | 1        |

\*Give information separately for cases and controls in case-control studies and, if applicable, for exposed and unexposed groups in cohort and cross-sectional studies.

**Note:** An Explanation and Elaboration article discusses each checklist item and gives methodological background and published examples of transparent reporting. The STROBE checklist is best used in conjunction with this article (freely available on the Web sites of PLoS Medicine at <http://www.plosmedicine.org/>, Annals of Internal Medicine at <http://www.annals.org/>, and Epidemiology at <http://www.epidem.com/>). Information on the STROBE Initiative is available at [www.strobe-statement.org](http://www.strobe-statement.org).
